# Supplementary material for: Copper-incorporated mono- and di-TeRu5metal carbonyl complexes: syntheses, structures, and an unusual skeletal arrangement
Source: Royal Society of Chemistry journal article supplement (doi:10.1039/c5dt00546a), 2015-01-01

## Supplementary Information for

### Copper-Incorporated Mono- and Di-TeRu<sub>5</sub> Metal Carbonyl Complexes: Syntheses, Structures, and an Unusual Skeletal Arrangement

Minghuey Shieh,\* Chia-Yeh Miu, Kai-Jieah Hsing, Li-Fing Jang, and Chien-Nan, Lin  
Department of Chemistry, National Taiwan Normal University, Taipei 11677, Taiwan,  
Republic of China

#### Contents

|                                                                                                                                                                      |               |
|----------------------------------------------------------------------------------------------------------------------------------------------------------------------|---------------|
| <b>Explanations for the checkCIF alerts</b>                                                                                                                          | Page S2       |
| <b>Computation details</b>                                                                                                                                           | Pages S3-S4   |
| <b>Electrochemistry details</b>                                                                                                                                      | Pages S4-S5   |
| <b>Electronic absorption and diffuse reflectance spectra</b>                                                                                                         | Page S5       |
| <b>References</b>                                                                                                                                                    | Pages S6-S7   |
| <b>Table S1</b> The Ru—Cu and Cu—Cu bond lengths (Å) of di-Cu-capped isomers <b>3a</b> and <b>3b</b>                                                                 | Page S8       |
| <b>Table S2</b> Experimental and calculated geometric parameters of [TeRu <sub>5</sub> (CO) <sub>14</sub> ] <sup>2-</sup> , <b>1</b> , <b>3a</b> , and <b>3b</b>     | Pages S9-S10  |
| <b>Table S3</b> Results of NBO and NPA of [TeRu <sub>5</sub> (CO) <sub>14</sub> ] <sup>2-</sup> , <b>1</b> , <b>3a</b> , <b>3b</b> , <b>I1</b> , and <b>I2</b>       | Page S11      |
| <b>Table S4</b> The optimized geometries of one- and two-electron oxidized species of <b>1</b> ( <b>1'</b> , <b>1''</b> )                                            | Page S12      |
| <b>Table S5</b> UV-vis absorptions and calculated transitions of <b>1</b>                                                                                            | Page S13      |
| <b>Table S6</b> Cartesian coordinates of all optimized geometries                                                                                                    | Pages S14-S20 |
| <b>Table S7</b> Cyclic voltammetry and differential pulse voltammetry of <b>1</b> , <b>3a</b> , and <b>3b</b>                                                        | Page S21      |
| <b>Table S8</b> Selected bond distances and bond angles of <b>1</b> , <b>2</b> , <b>3a</b> , and <b>3b</b>                                                           | Pages S22-S25 |
| <b>Fig. S1</b> Variable temperature <sup>1</sup> H NMR spectra for <b>3a</b> from -40 to 50 °C in CDCl <sub>3</sub>                                                  | Page S26      |
| <b>Fig. S2</b> Spatial graphs of the frontier molecular orbitals of [TeRu <sub>5</sub> (CO) <sub>14</sub> ] <sup>2-</sup> , <b>1</b> , <b>3a</b> , and <b>3b</b>     | Page S27      |
| <b>Fig. S3</b> Experimental and calculated absorption spectra of <b>1</b>                                                                                            | Page S28      |
| <b>Fig. S4</b> Spatial plots of selected frontier orbitals for <b>1</b> , with calculation in CH <sub>2</sub> Cl <sub>2</sub> (for TDDFT)                            | Page S29      |
| <b>Fig. S5</b> Cyclic voltammetry of <b>1</b> , <b>3a</b> , and <b>3b</b>                                                                                            | Page S30      |
| <b>Fig. S6</b> The controlled-potential coulometry (CPC) experiments for <b>1</b> , <b>3a</b> , and <b>3b</b>                                                        | Page S31      |
| <b>Fig. S7</b> UV-vis spectra of [TeRu <sub>5</sub> (CO) <sub>14</sub> ] <sup>2-</sup> and <b>1</b> in CH <sub>2</sub> Cl <sub>2</sub>                               | Page S32      |
| <b>Fig. S8</b> The optical reflectance spectra of [TeRu <sub>5</sub> (CO) <sub>14</sub> ] <sup>2-</sup> , <b>1</b> , <b>2</b> , <b>3a</b> , <b>3b</b> , and <b>4</b> | Page S33      |

### Explanations for the checkCIF alerts for [PPh<sub>4</sub>]<sub>2</sub>[1]:

#### ● Alert level B

|                |                  |                                         |             |
|----------------|------------------|-----------------------------------------|-------------|
| <u>PLAT331</u> | <u>ALERT 2_B</u> | Small Average Phenyl C-C Dist. C71-C76  | 1.36 Ang.   |
| <u>PLAT342</u> | <u>ALERT 3_B</u> | Low Bond Precision on C-C Bonds .....   | 0.0365 Ang. |
| <u>PLAT430</u> | <u>ALERT 2_B</u> | Short Inter D...A Contact O3 .. O14 ..  | 2.83 Ang.   |
| <u>PLAT430</u> | <u>ALERT 2_B</u> | Short Inter D...A Contact O13 .. O21 .. | 2.84 Ang.   |

**Explanation:** Crystals were diffracted extremely weakly because of the low quality of the crystals ( $R(\text{int}) = 0.1771$ ). This lack of high resolution data therefore affected the precision on C-C bonds and O...O contacts. SIMU and DELU restraints were applied to the C atoms in the phenyls. Some atoms were still not ideally shaped, however, this does not indicate an incorrect atom-type assignment.

### Explanations for the checkCIF alerts for [PPh<sub>4</sub>]<sub>4</sub>[2]·3Et<sub>2</sub>O:

#### ● Alert level A

|                |                  |                                         |          |
|----------------|------------------|-----------------------------------------|----------|
| <u>PLAT430</u> | <u>ALERT 2_A</u> | Short Inter D...A Contact O21 .. O21 .. | 2.10 Ang |
|----------------|------------------|-----------------------------------------|----------|

#### ● Alert level B

|                |                  |                                       |            |
|----------------|------------------|---------------------------------------|------------|
| <u>PLAT342</u> | <u>ALERT 3_B</u> | Low Bond Precision on C-C Bonds ..... | 0.0268 Ang |
|----------------|------------------|---------------------------------------|------------|

**Explanation:** Crystals were diffracted extremely weakly because of the low quality of the crystals ( $R(\text{int}) = 0.1119$ ). In addition, disorder of the solvent should weaken the reflections with low theta angle. One Et<sub>2</sub>O molecule, chaotically disordered around the inversion centre, was approximated by arbitrary O and C positions with fractional occupancies, totalling one OC<sub>4</sub> for the void. This lack of high resolution data therefore affected the precision on the O...O contact and C-C bonds. The enhanced rigid-bond restraint RIGU was applied to all the atoms. Some atoms were still not ideally shaped, however, this does not indicate an incorrect atom-type assignment.

## Computation details

All calculations reported in this study were performed via the density functional theory (DFT) with the modified Perdew–Wang exchange functional with Perdew–Wang’s 91 gradient–correlation functional (MPW1PW91)<sup>2</sup> using the Gaussian 03<sup>3</sup> series of packages or the periodic code of Dmol<sup>3</sup> 6.0 package<sup>4</sup> with the general gradient approximation (GGA) plus the RPBE functional.<sup>5</sup> The geometries of  $[\text{TeRu}_5(\text{CO})_{14}]^{2-}$ , **1**, **3a**, and **3b** taken from single-crystal X-ray diffraction data were fully optimized via the periodic code of Dmol<sup>3</sup> 6.0 package,<sup>4</sup> because of a better structural converge and correlation with experimental structural parameters (Table S2). Effective core potentials (ECP) and a DND basis set were used in the calculations. The lattice parameter for lengths was  $a = b = c = 30 \text{ \AA}$  and the lattice parameter for angles was  $\alpha = \beta = \gamma = 90^\circ$ . The self-consistent-field interaction was performed with a convergence criterion  $10^{-5}$  a.u. on the total energy. Further, our analyses for the Cartesians coordinates of these optimized Te–Ru–Cu complexes (in gas phase) were used to perform on the newer generation functional, MPW1PW91, with the LanL2DZ/ECP<sup>6</sup> basis set for Te, Ru, Cu, and Cl atoms and the 6-31+G\* basis set for C, O, N, and H atoms by using the Gaussian 03 series of packages, which the functional has been shown to have the better correlation for some heavy transition metal complexes.<sup>7,8</sup> Natural charges<sup>9</sup> and Wiberg bond indices<sup>10</sup> were evaluated with Weinhold’s NBO method.<sup>11</sup>

The nature of all stationary points provided positive eigenvalues for reactant **3a**, product **3b**, and the intermediate **I1** and one imaginary eigenvalue for transition state **TS** and **I2** (anharmonic effect for the methyl rotation)<sup>12</sup> through vibration frequencies calculations which were calculated at the MPW1PW91 functional with LanL2DZ basis set for all the atoms. The potential energy surface scan calculations were done by increasing the selected Ru–Cu bond of **I1** with a  $0.10 \text{ \AA}$  step size and were used to verify that the **TS** found was linked to the intermediates **I1** and **I2** or product **3b**. For the electronic absorption spectrum,

on the basis of the experimental coordinates of **1**, low-lying 150 singlet states were employed to produce the vertical excitation for all of the molecules in the CH<sub>2</sub>Cl<sub>2</sub> media using the time-dependent DFT (TDDFT) method<sup>13</sup> at the same level associated with the conductor-like polarizable continuum model (CPCM).<sup>14</sup> Calculation of UV-vis spectra was accomplished using GaussSum 2.2.<sup>15</sup> Electronic transitions were expanded as Gaussian curves, with a full width at half maximum (fwhm) for each peak set to 3000 cm<sup>-1</sup>. Graphical representations of the molecular orbitals were obtained using GaussView 5.0. For orbital contributions, the molecular orbital compositions were analyzed using the AOMIX program.<sup>16</sup>

### Electrochemistry details

The cyclic voltammetry (CV) and differential pulse voltammetry (DPV) measurements were performed at room temperature under a nitrogen atmosphere and recorded using a CHI 621D electrochemical potentiostat. A glassy carbon working electrode, a platinum wire auxiliary electrode, and a non-aqueous Ag/Ag<sup>+</sup> electrode were used in a three-electrode configuration. For the controlled-potential coulometry (CPC) measurements, the working electrode, auxiliary electrode, and reference electrode were the same as those used for CV and DPV measurements. Tetra-*n*-butylammonium perchlorate (TBAP) was used as the supporting electrolyte, and the solute concentration was ~10<sup>-3</sup>-10<sup>-4</sup> M. The redox potentials were calibrated with a ferrocenium/ferrocene (Fc<sup>+</sup>/Fc) couple in the working solution and referenced to SCE.

The electronic stoichiometry is determined by the measurement of the peak width at half-height ( $W_{1/2}$ ) of the DPVs (Table S7) and by the CPC experiments (Fig. S6).<sup>17</sup> As shown in Table S7, the widths of the DPV peaks at half-height of **1**, **3a**, and **3b** are a bit greater than the value ( $W_{1/2} = 90$  mV) expected for one-electron reversible redox reactions, indicating that these DPV responses are quasi-reversible.<sup>18</sup> However, the CPC experiments indicated that **1**,

**3a**, and **3b** each possessed 0.2, 0.2, and 0.5 electrons per molecular (Fig. S6), which was not adequate to determine the electronic stoichiometry in our experimental conditions so as in many other cases due to the difficulty in controlling the complicated experimental parameters. Therefore, the  $W_{1/2}$  of DPV peaks still remained a practical approach to determine the electronic stoichiometry as mentioned in our and others' studies.

### **Electronic absorption and diffuse reflectance spectra.**

The electronic absorption spectra of solution samples of  $[\text{TeRu}_5(\text{CO})_{14}]^{2-}$  and **1** (Fig. S7) were scanned at room temperature with a Varian Cary 5000 UV–vis–NIR spectrophotometer between 200–800 nm in  $\text{CH}_2\text{Cl}_2$  solution ( $10^{-4}$  M) with a conventional 1.0 cm quartz cell. The diffuse reflectance spectra of solid samples of  $[\text{TeRu}_5(\text{CO})_{14}]^{2-}$  and **1–4** (Fig. S8) were measured at room temperature between 200–2500 nm with  $\text{Al}_2\text{O}_3$  powder for the 100% reflectance reference by using a Varian Cary 5000 UV–vis–NIR spectrophotometer and the room temperature optical absorption spectra of those solid compounds were obtained from diffuse reflectance experiment. The reflectance spectrum was converted to the absorption by using the Kubelka-Munk function,  $F = (1 - R)^2 / 2R$ .<sup>19,20</sup> The band gap was determined in the F-versus-E plot, by extrapolating the linear portion of starting rising curve to zero, which provided the onset of absorption.

## References

- 1 P. Sluis Van der and A. L. Spek, *Acta Crystallogr. Sect. A*, 1990, **46**, 194–201.
- 2 C. Adamo and V. Barone, *J. Chem. Phys.*, 1998, **108**, 664–675.
- 3 M. J. Frisch, G. W. Trucks, H. B. Schlegel, G. E. Scuseria, M. A. Robb, J. R. Cheeseman, J. A., Jr. Montgomery, T. Vreven, K. N. Kudin, J. C. Burant, J. M. Millam, S. S. Iyengar, J. Tomasi, V. Barone, B. Mennucci, M. Cossi, G. Scalmani, N. Rega, G. A. Petersson, H. Nakatsuji, M. Hada, M. Ehara, K. Toyota, R. Fukuda, J. Hasegawa, M. Ishida, T. Nakajima, Y. Honda, O. Kitao, H. Nakai, M. Klene, X. Li, J. E. Knox, H. P. Hratchian, J. B. Cross, V. Bakken, C. Adamo, J. Jaramillo, R. Gomperts, R. E. Stratmann, O. Yazyev, A. J. Austin, R. Cammi, C. Pomelli, J. W. Ochterski, P. Y. Ayala, K. Morokuma, G. A. Voth, P. Salvador, J. J. Dannenberg, V. G. Zakrzewski, S. Dapprich, A. D. Daniels, M. C. Strain, O. Farkas, D. K. Malick, A. D. Rabuck, K. Raghavachari, J. B. Foresman, J. V. Ortiz, Q. Cui, A. G. Baboul, S. Clifford, J. Cioslowski, B. B. Stefanov, G. Liu, A. Liashenko, P. Piskorz, I. Komaromi, R. L. Martin, D. J. Fox, T. Keith, M. A. Al-Laham, C. Y. Peng, A. Nanayakkara, M. Challacombe, P. M. W. Gill, B. Johnson, W. Chen, M. W. Wong, C. Gonzalez and J. A. Pople, *Gaussian 03*, Revision E.04, Gaussian, Inc.: Wallingford, CT, 2004.
- 4 B. Delley, *J. Chem. Phys.*, 1990, **92**, 508–517.
- 5 B. Hammer, L. B. Hansen and J. K. Norskov, *Phys. Rev. B*, 1999, **59**, 7413–7421.
- 6 P. J. Hay and W. R. Wadt, *J. Chem. Phys.*, 1985, **82**, 299–310.
- 7 S. Zhao, Z.-H. Li, W.-N. Wang, Z.-P. Liu, K.-N. Fan, Y. Xie and H. F. Schaefer, *J. Chem. Phys.*, 2006, **124**, 184102–4073.
- 8 X. Feng, J. Gu, Y. Xie, R. B. King and H. F. Schaefer, *J. Chem. Theory Comput.*, 2007, **3**, 1580–1587.
- 9 A. E. Reed, R. B. Weinstock and F. Weinhold, *J. Chem. Phys.*, 1985, **83**, 735–746.

- 10 K. B. Wiberg, *Tetrahedron*, 1968, **24**, 1083–1096.
- 11 (a) A. E. Reed and F. Weinhold, *J. Chem. Phys.*, 1983, **78**, 4066–4073; (b) A. E. Reed, L. A. Curtiss and F. Weinhold, *Chem. Rev.*, 1988, **88**, 899–926.
- 12 A. M. Brouwer, J. M. Zwier, C. Svendsen, O. S. Mortensen, F. W. Langkilde and R. Wilbrandt, *J. Am. Chem. Soc.*, 1998, **120**, 3748–3757.
- 13 (a) R. E. Stratmann, G. E. Scuseria and M. J. Frisch, *J. Chem. Phys.*, 1998, **109**, 8218–8224; (b) R. Bauernschmitt and R. Ahlrichs, *Chem. Phys. Lett.*, 1996, **256**, 454–464; (c) M. E. Casida, C. Jamorski, K. C. Casida and D. R. Salahub, *J. Chem. Phys.*, 1998, **108**, 4439–4449.
- 14 (a) V. Barone and M. Cossi, *J. Phys. Chem. A*, 1998, **102**, 1995–2001; (b) M. Cossi, N. Rega, G. Scalmani and V. Barone, *J. Comput. Chem.*, 2003, **24**, 669–681.
- 15 N. M. O’Boyle, A. L. Tenderholt and K. M. Langner, *J. Comput. Chem.*, 2008, **29**, 839–845.
- 16 S. I. Gorelsky, *AOMix* program, <http://www.sg-chem.net/>.
- 17 A. J. Bard and L. R. Faulkner, *Electrochemical Methods; Fundamentals and Applications*, 2<sup>nd</sup> ed. John Wiley & Sons: New York, 2001, p. 291.
- 18 T. Nakanishi, H. Murakami, T. Sagara and N. Nakashima, *J. Phys. Chem. B*, 1999, **103**, 304–308.
- 19 P. Kubelka and F. Munk, *Z. Tech. Phys.*, 1931, **12**, 593–601.
- 20 J. Tauc, *Mater. Res. Bull.*, 1970, **5**, 721–730.

**Table S1** The Ru—Cu and Cu—Cu bond lengths (Å) of di-Cu-capped isomers **3a** and **3b**·0.5CH<sub>2</sub>Cl<sub>2</sub>

| <b>3a</b>   | Bond lengths | $\Delta^a$ | <b>3b</b> ·0.5CH <sub>2</sub> Cl <sub>2</sub> | Bond lengths | $\Delta^a$ |
|-------------|--------------|------------|-----------------------------------------------|--------------|------------|
| Ru(1)—Cu(1) | 2.5953(4)    | 0.0630(4)  | Ru(1)—Cu(1)                                   | 2.588(1)     | 0.067(1)   |
| Ru(2)—Cu(1) | 2.6502(4)    |            | Ru(2)—Cu(1)                                   | 2.655(1)     |            |
| Ru(5)—Cu(1) | 2.6583(4)    |            |                                               |              |            |
| Ru(2)—Cu(2) | 2.6304(4)    | 0.0310(4)  | Ru(1)—Cu(2)                                   | 2.6321(9)    | 0.028      |
| Ru(3)—Cu(2) | 2.6250(4)    |            | Ru(2)—Cu(2)                                   | 2.6445(9)    |            |
| Ru(5)—Cu(2) | 2.6560(4)    |            | Ru(5)—Cu(2)                                   | 2.660(1)     |            |
| Cu(1)—Cu(2) | 3.8896(6)    |            | Cu(1)—Cu(2)                                   | 2.645(1)     |            |

<sup>a</sup> Difference between the longer Ru—Cu and the shorter Ru—Cu bond



**Table S2** Comparison of selected structural parameters of the optimized geometries for  $[\text{TeRu}_5(\text{CO})_{14}]^{2-}$ , **1**, **3a**, and **3b** with the experimental structural parameters, calculated by using Dmol<sup>3</sup> package with the general gradient approximation (GGA) plus the RPBE functional

| bond distances | $[\text{TeRu}_5(\text{CO})_{14}]^{2-}$ |                    |
|----------------|----------------------------------------|--------------------|
|                | X-ray                                  | optimized geometry |
| Te(1)–Ru(2)    | 2.665                                  | 2.751              |
| Te(1)–Ru(3)    | 2.723                                  | 2.773              |
| Te(1)–Ru(4)    | 2.748                                  | 2.843              |
| Te(1)–Ru(5)    | 2.686                                  | 2.760              |
| Ru(2)–Ru(3)    | 2.877                                  | 2.966              |
| Ru(2)–Ru(5)    | 2.899                                  | 3.019              |
| Ru(4)–Ru(3)    | 2.815                                  | 2.897              |
| Ru(4)–Ru(5)    | 2.846                                  | 2.929              |
| Ru(6)–Ru(2)    | 2.843                                  | 2.939              |
| Ru(6)–Ru(3)    | 2.869                                  | 3.018              |
| Ru(6)–Ru(4)    | 2.882                                  | 2.967              |
| Ru(6)–Ru(5)    | 2.841                                  | 2.917              |
| <b>1</b>       |                                        |                    |
| bond distances | X-ray                                  | optimized geometry |
| Te(1)–Ru(6)    | 2.674                                  | 2.762              |
| Te(1)–Ru(7)    | 2.663                                  | 2.762              |
| Te(1)–Ru(8)    | 2.744                                  | 2.837              |
| Te(1)–Ru(9)    | 2.728                                  | 2.801              |
| Te(2)–Ru(1)    | 2.731                                  | 2.812              |
| Te(2)–Ru(2)    | 2.748                                  | 2.819              |
| Te(2)–Ru(3)    | 2.675                                  | 2.764              |
| Te(2)–Ru(4)    | 2.677                                  | 2.768              |
| Ru(6)–Ru(7)    | 3.070                                  | 3.306              |
| Ru(6)–Ru(9)    | 2.838                                  | 2.912              |
| Ru(8)–Ru(7)    | 2.823                                  | 2.896              |
| Ru(8)–Ru(9)    | 2.818                                  | 2.916              |
| Ru(10)–Ru(6)   | 2.890                                  | 2.998              |
| Ru(10)–Ru(7)   | 2.912                                  | 2.996              |
| Ru(10)–Ru(8)   | 2.847                                  | 2.979              |
| Ru(10)–Ru(9)   | 2.842                                  | 2.952              |
| Ru(1)–Ru(2)    | 2.832                                  | 2.922              |
| Ru(1)–Ru(4)    | 2.834                                  | 2.903              |
| Ru(3)–Ru(2)    | 2.809                                  | 2.911              |
| Ru(3)–Ru(4)    | 3.071                                  | 3.221              |
| Ru(5)–Ru(1)    | 2.826                                  | 2.951              |
| Ru(5)–Ru(2)    | 2.889                                  | 2.939              |
| Ru(5)–Ru(3)    | 2.900                                  | 3.032              |
| Ru(5)–Ru(4)    | 2.880                                  | 3.006              |
| Cu(1)–Ru(3)    | 2.653                                  | 2.751              |
| Cu(1)–Ru(4)    | 2.694                                  | 2.765              |
| Cu(1)–Ru(5)    | 2.691                                  | 2.781              |
| Cu(2)–Ru(6)    | 2.670                                  | 2.708              |
| Cu(2)–Ru(7)    | 2.655                                  | 2.740              |
| Cu(2)–Ru(10)   | 2.661                                  | 2.861              |
| Cu(3)–Ru(4)    | 2.583                                  | 2.710              |
| Cu(3)–Ru(6)    | 2.568                                  | 2.668              |
| Cu(3)–Cu(1)    | 2.599                                  | 2.589              |

|                |       |                    |
|----------------|-------|--------------------|
| Cu(3)—Cu(2)    | 2.483 | 2.706              |
| Cu(1)—Cl(1)    | 2.236 | 2.277              |
| Cu(2)—Cl(1)    | 2.218 | 2.299              |
| <b>3a</b>      |       |                    |
| bond distances | X-ray | optimized geometry |
| Te(1)—Ru(1)    | 2.672 | 2.769              |
| Te(1)—Ru(2)    | 2.672 | 2.751              |
| Te(1)—Ru(3)    | 2.681 | 2.766              |
| Te(1)—Ru(4)    | 2.762 | 2.848              |
| Ru(1)—Ru(2)    | 3.000 | 3.141              |
| Ru(1)—Ru(4)    | 2.808 | 2.891              |
| Ru(3)—Ru(2)    | 3.002 | 3.149              |
| Ru(3)—Ru(4)    | 2.804 | 2.884              |
| Ru(5)—Ru(1)    | 2.887 | 3.016              |
| Ru(5)—Ru(2)    | 2.915 | 3.079              |
| Ru(5)—Ru(3)    | 2.899 | 3.010              |
| Ru(5)—Ru(4)    | 2.869 | 2.971              |
| Cu(1)—Ru(1)    | 2.595 | 2.706              |
| Cu(1)—Ru(2)    | 2.650 | 2.727              |
| Cu(1)—Ru(5)    | 2.658 | 2.697              |
| Cu(2)—Ru(2)    | 2.630 | 2.709              |
| Cu(2)—Ru(3)    | 2.625 | 2.670              |
| Cu(2)—Ru(5)    | 2.656 | 2.735              |
| Cu(1)—N(1)     | 1.899 | 1.925              |
| Cu(2)—N(2)     | 1.909 | 1.932              |
| <b>3b</b>      |       |                    |
| bond distances | X-ray | optimized geometry |
| Te(1)—Ru(1)    | 2.671 | 2.778              |
| Te(1)—Ru(2)    | 2.674 | 2.769              |
| Te(1)—Ru(3)    | 2.708 | 2.808              |
| Te(1)—Ru(4)    | 2.712 | 2.804              |
| Ru(1)—Ru(2)    | 3.015 | 3.141              |
| Ru(1)—Ru(4)    | 2.823 | 2.888              |
| Ru(3)—Ru(2)    | 2.818 | 2.905              |
| Ru(3)—Ru(4)    | 2.846 | 2.914              |
| Ru(5)—Ru(1)    | 2.901 | 3.016              |
| Ru(5)—Ru(2)    | 2.897 | 3.016              |
| Ru(5)—Ru(3)    | 2.819 | 2.913              |
| Ru(5)—Ru(4)    | 2.825 | 2.930              |
| Cu(1)—Ru(1)    | 2.588 | 2.651              |
| Cu(1)—Ru(2)    | 2.655 | 2.724              |
| Cu(2)—Ru(1)    | 2.632 | 2.741              |
| Cu(2)—Ru(2)    | 2.645 | 2.751              |
| Cu(2)—Ru(5)    | 2.660 | 2.695              |
| Cu(1)—Cu(2)    | 2.645 | 2.643              |
| Cu(1)—N(1)     | 1.909 | 1.902              |
| Cu(2)—N(2)     | 1.915 | 1.929              |

**Table S3** Results of natural bond order and natural population analyses of  $[\text{TeRu}_5(\text{CO})_{14}]^{2-}$ , **1**, **3a**, **3b**, **I1**, and **I2**

| complex                                               | Wiberg bond index |       |       |       |                  | Natural charge |        |       |         |                                          |                                  |
|-------------------------------------------------------|-------------------|-------|-------|-------|------------------|----------------|--------|-------|---------|------------------------------------------|----------------------------------|
|                                                       | Te–Ru             | Ru–Ru | Ru–Cu | Cu–Cu | Cu–Cl<br>or Cu–N | Te             | Ru     | Cu    | Cl or N | $\text{TeRu}_5(\text{CO})_{14}$<br>(sum) | $\text{Cu}_m\text{X}_n$<br>(sum) |
| $[\text{TeRu}_5(\text{CO})_{14}]^{2-}$ (m = 0, n = 0) | 0.323             | 0.131 |       |       |                  | -0.105         | -0.315 |       |         | -2                                       | 0                                |
| <b>1</b> (X = Cl, m = 3, n = 1)                       | 0.338             | 0.127 | 0.092 | 0.068 | 0.168            | 0.038          | -0.392 | 0.560 | -0.692  | -2.989                                   | 0.989                            |
| <b>3a</b> (X = MeCN, m = 2, n = 2)                    | 0.354             | 0.137 | 0.096 |       | 0.176            | 0.066          | -0.421 | 0.574 | -0.538  | -1.247                                   | 1.247                            |
| <b>3b</b> (X = MeCN, m = 2, n = 2)                    | 0.352             | 0.137 | 0.114 | 0.065 | 0.184            | 0.059          | -0.433 | 0.540 | -0.550  | -1.191                                   | 1.191                            |
| <b>I1</b> <sup>a</sup> (X = MeCN, m = 2, n = 2)       | 0.341             | 0.124 | 0.071 |       | 0.183            | 0.190          | -0.432 | 0.727 | -0.534  | -1.565                                   | 1.565                            |
| <b>I2</b> <sup>a</sup> (X = MeCN, m = 2, n = 2)       | 0.338             | 0.121 | 0.082 | 0.049 | 0.171            | 0.183          | -0.407 | 0.710 | -0.535  | -1.534                                   | 0.534                            |

<sup>a</sup> Calculated by MPW1PW91/LanL2DZ.

**Table S4** Calculated results for the optimized geometries of one-electron and two-electron oxidized species of **1** (**1'**, **1''**)

|                                                   | <b>1</b><br>( $S = 0$ )    | <b>1'</b><br>( $S = 1/2$ ) | <b>1''</b><br>( $S = 0$ ) | <b>1''</b><br>( $S = 1$ ) |
|---------------------------------------------------|----------------------------|----------------------------|---------------------------|---------------------------|
| relative energy (kcal mol <sup>-1</sup> )         |                            |                            | 0.00                      | 0.07                      |
| bond lengths (Å)                                  |                            |                            |                           |                           |
| Te—Ru (av.)                                       | 2.791 (2.705) <sup>c</sup> | 2.791                      | 2.788                     | 2.791                     |
| Ru—Ru (av.)                                       | 2.990 (2.880) <sup>c</sup> | 2.980                      | 2.976                     | 2.981                     |
| Ru—Cu (av.)                                       | 2.748 (2.647) <sup>c</sup> | 2.739                      | 2.717                     | 2.734                     |
| Cu—Cl (av.)                                       | 2.288 (2.227) <sup>c</sup> | 2.276                      | 2.256                     | 2.274                     |
| Cu—Cu <sup>a</sup> (av.)                          | 2.648 (2.541) <sup>c</sup> | 2.640                      | 2.628                     | 2.644                     |
| Cu—Cu <sup>b</sup>                                | 3.245 (2.938) <sup>c</sup> | 2.971                      | 2.889                     | 3.021                     |
| metal spin density                                |                            |                            |                           |                           |
| Ru <sub>5</sub> /Cu <sub>3</sub> /Ru <sub>5</sub> |                            | 0.63/0.08/0.06             |                           | 0.77/0.04/0.95            |

<sup>a</sup> Bridged by Ru atom. <sup>b</sup> Bridged by Cl atom. <sup>c</sup> From single-crystal diffraction data.

**Table S5** Selected low-lying singlet excited states ( $S_n$ ) in **1**, calculated by TD-MPW1PW91/LanL2DZ/6-31+G\*/CPCM (CH<sub>2</sub>Cl<sub>2</sub>), with the orbital involved in the dominant excitations, transition (percentage contribution), vertical excitation energies (nm), oscillator strength ( $f$ )

| complex  | $S_n$ | major transition<br>(percentage contribution)                                                                                    | vertical excitation energy (nm) |        | oscillator strength ( $f$ ) |
|----------|-------|----------------------------------------------------------------------------------------------------------------------------------|---------------------------------|--------|-----------------------------|
|          |       |                                                                                                                                  | expt                            | calcd  |                             |
| <b>1</b> | 5     | HOMO-1→LUMO+2 (47%)<br>HOMO-3→LUMO+2 (18%)                                                                                       | 595                             | 565.67 | 0.0103                      |
|          | 8     | HOMO-2→LUMO+2 (26%)<br>HOMO-3→LUMO (14%)<br>HOMO-3→LUMO+3 (-10%)                                                                 |                                 | 538.43 | 0.0238                      |
|          | 27    | HOMO-2→LUMO+4 (13%)<br>HOMO-2→LUMO (-8%)<br>HOMO-3→LUMO+3 (8%)<br>HOMO-2→LUMO+3 (7%)<br>HOMO-5→LUMO (-6%)<br>HOMO-1→LUMO+3 (-4%) | 426                             | 428.21 | 0.0423                      |
|          | 40    | HOMO-10→LUMO (17%)<br>HOMO-9→LUMO (17%)<br>HOMO-5→LUMO+4 (5%)<br>HOMO-7→LUMO (4%)<br>HOMO-5→LUMO+2 (3%)                          |                                 | 393.95 | 0.1161                      |

**Table S6** Cartesian coordinates of all optimized geometries. The optimized geometries of  $[\text{TeRu}_5(\text{CO})_{14}]^{2-}$ , **1**, **3a**, and **3b** were performed via the periodic code of DMol<sup>3</sup> package with the general gradient approximation (GGA) plus the RPBE functional. In addition, for the mechanism study, the optimized geometries of **3a**, **3b**, **I1**, **I2**, and **TS** were further performed via Gaussian 03 series of packages with MPW1PW91/LanL2DZ method

$[\text{TeRu}_5(\text{CO})_{14}]^{2-}$  (DMol<sup>3</sup>)

Total energy = -2071.3299922 a.u.

|    | x         | y         | z        |
|----|-----------|-----------|----------|
| Te | 8.717600  | 13.437800 | 7.001800 |
| Ru | 6.031400  | 13.892900 | 6.617800 |
| Ru | 7.493400  | 11.760800 | 5.163800 |
| Ru | 9.495600  | 13.656700 | 4.276500 |
| Ru | 8.173000  | 15.827000 | 5.731700 |
| Ru | 6.643600  | 14.300700 | 3.772700 |
| O  | 4.780400  | 16.592300 | 7.344100 |
| O  | 5.288600  | 12.764500 | 9.371000 |
| O  | 3.557600  | 12.656900 | 5.296100 |
| O  | 8.077100  | 9.402500  | 7.009000 |
| O  | 5.469700  | 9.941000  | 3.779300 |
| O  | 9.597800  | 10.689600 | 3.257400 |
| O  | 10.222300 | 13.777600 | 1.319600 |
| O  | 12.422000 | 13.127300 | 5.007400 |
| O  | 10.585000 | 16.603600 | 4.067700 |
| O  | 6.841000  | 18.324100 | 4.582800 |
| O  | 9.392100  | 17.530700 | 7.969200 |
| O  | 5.813700  | 12.394700 | 1.515900 |
| O  | 7.846100  | 16.159200 | 1.659300 |
| O  | 3.995100  | 15.858000 | 3.650700 |
| C  | 5.341700  | 15.612400 | 7.017300 |
| C  | 5.613500  | 13.185200 | 8.321800 |
| C  | 4.570200  | 13.107100 | 5.690600 |
| C  | 7.842200  | 10.322500 | 6.312800 |
| C  | 6.231000  | 10.691400 | 4.267700 |
| C  | 9.050200  | 11.518200 | 3.918500 |
| C  | 9.917900  | 13.772000 | 2.452300 |
| C  | 11.294200 | 13.334900 | 4.751600 |
| C  | 9.764300  | 15.873900 | 4.532100 |
| C  | 7.313000  | 17.337700 | 5.011500 |
| C  | 8.913700  | 16.844800 | 7.140200 |
| C  | 6.137000  | 13.037800 | 2.444200 |
| C  | 7.471200  | 15.439700 | 2.506800 |
| C  | 4.993700  | 15.256300 | 3.782500 |

$[\{\text{TeRu}_5(\text{CO})_{14}\}_2\text{Cu}_3\text{Cl}]^{2-}$  (**1**) (DMol<sup>3</sup>)

Total energy = -5195.2493388 a.u.

|   | x        | y        | z         |
|---|----------|----------|-----------|
| C | 9.321400 | 4.367200 | -3.241800 |
| C | 9.093100 | 3.665800 | -5.962100 |
| C | 9.580500 | 6.315100 | -5.331600 |
| C | 7.248400 | 5.638000 | -6.807300 |
| C | 5.166500 | 7.542100 | -6.293400 |
| C | 4.487500 | 5.050800 | -7.153700 |
| C | 3.470900 | 5.734200 | -4.666600 |
| C | 3.050400 | 4.135100 | -2.442400 |
| C | 3.752600 | 6.675500 | -2.005200 |

|    |           |          |           |
|----|-----------|----------|-----------|
| C  | 8.400200  | 5.478100 | -0.859100 |
| C  | 8.023600  | 2.731200 | -1.492000 |
| C  | 7.140200  | 1.607000 | -4.084200 |
| C  | 4.388000  | 2.159800 | -4.263600 |
| C  | 6.127800  | 2.772700 | -6.308400 |
| C  | 3.669900  | 5.114000 | 1.471100  |
| C  | 5.805800  | 6.846700 | 1.284700  |
| C  | 4.254000  | 6.740700 | 3.606800  |
| C  | 5.724400  | 7.595400 | 5.953700  |
| C  | 3.621400  | 5.822600 | 6.173500  |
| C  | 6.212400  | 5.000700 | 7.047300  |
| C  | 8.921100  | 4.189700 | 6.582200  |
| C  | 6.987700  | 2.266900 | 6.906800  |
| C  | 8.339000  | 2.248900 | 4.476500  |
| C  | 7.264900  | 1.417500 | 2.074100  |
| C  | 9.110300  | 3.355000 | 1.986800  |
| C  | 4.205900  | 2.846100 | 6.097600  |
| C  | 2.970200  | 3.314900 | 3.719800  |
| C  | 4.901300  | 1.245700 | 3.977600  |
| O  | 10.466100 | 4.108200 | -3.070200 |
| O  | 9.690500  | 2.867500 | -6.565300 |
| O  | 10.452200 | 7.055300 | -5.560200 |
| O  | 7.584800  | 5.818900 | -7.930200 |
| O  | 4.971900  | 8.629000 | -6.671500 |
| O  | 3.851900  | 4.694800 | -8.063300 |
| O  | 2.384900  | 5.939500 | -5.102200 |
| O  | 2.069600  | 3.583800 | -2.136900 |
| O  | 3.264400  | 7.573400 | -1.441300 |
| O  | 9.080600  | 6.170700 | -0.199600 |
| O  | 8.445600  | 1.731400 | -1.063800 |
| O  | 7.754500  | 0.618600 | -4.002500 |
| O  | 3.431800  | 1.487500 | -4.292700 |
| O  | 6.194600  | 2.388400 | -7.410700 |
| O  | 2.658300  | 5.069800 | 0.895700  |
| O  | 6.059100  | 7.807900 | 0.670600  |
| O  | 3.456800  | 7.613900 | 3.523700  |
| O  | 5.930000  | 8.662600 | 6.378100  |
| O  | 2.588600  | 5.883300 | 6.709900  |
| O  | 6.131200  | 5.164000 | 8.218400  |
| O  | 9.924800  | 4.427700 | 7.126500  |
| O  | 6.885000  | 1.376100 | 7.650500  |
| O  | 9.077100  | 1.364900 | 4.765100  |
| O  | 7.315000  | 0.337500 | 1.640100  |
| O  | 10.148900 | 3.435700 | 1.461500  |
| O  | 3.743400  | 2.589900 | 7.139500  |
| O  | 1.823800  | 3.341800 | 3.503600  |
| O  | 4.870100  | 0.080800 | 3.893700  |
| Te | 7.670400  | 5.730500 | 3.797200  |
| Te | 6.740400  | 6.792900 | -3.385900 |
| Ru | 8.204200  | 5.035200 | -5.002700 |
| Ru | 5.468600  | 5.762300 | -5.703200 |
| Ru | 4.471400  | 5.257900 | -3.031600 |
| Ru | 7.568300  | 4.426600 | -2.226600 |
| Ru | 6.027900  | 3.121700 | -4.442500 |
| Ru | 5.274200  | 5.434400 | 2.443100  |
| Ru | 7.470000  | 3.122900 | 2.901700  |
| Ru | 7.273100  | 3.728800 | 5.742500  |
| Ru | 5.307000  | 5.847700 | 5.316300  |
| Ru | 4.782200  | 3.125700 | 4.304800  |
| Cu | 5.313800  | 3.031900 | -1.673200 |

|    |          |          |           |
|----|----------|----------|-----------|
| Cu | 5.088400 | 2.821700 | 1.557400  |
| Cu | 6.540900 | 4.508200 | 0.234000  |
| Cl | 4.351800 | 1.561500 | -0.190100 |

[[TeRu<sub>5</sub>(CO)<sub>14</sub>]<sub>2</sub>Cu<sub>3</sub>Cl]<sup>-</sup> (**1'**, S = 1/2) (DMol<sup>3</sup>)

Total energy = -5195.1043569 a.u.

|   | x         | y        | z         |
|---|-----------|----------|-----------|
| C | 9.406100  | 4.338400 | -3.226100 |
| C | 9.083400  | 3.501700 | -5.853400 |
| C | 9.653300  | 6.186800 | -5.427800 |
| C | 7.281200  | 5.509500 | -6.792200 |
| C | 5.429400  | 7.593800 | -6.331500 |
| C | 4.487600  | 5.082600 | -7.017300 |
| C | 3.594200  | 6.086600 | -4.576200 |
| C | 3.047300  | 4.420000 | -2.429600 |
| C | 3.974800  | 6.846600 | -1.868400 |
| C | 8.474500  | 5.468700 | -0.811800 |
| C | 8.107000  | 2.732500 | -1.500300 |
| C | 6.784200  | 1.505400 | -3.843800 |
| C | 4.166500  | 2.458200 | -4.362800 |
| C | 6.162600  | 2.752200 | -6.160500 |
| C | 3.695300  | 5.265400 | 1.457100  |
| C | 5.925300  | 6.900700 | 1.338200  |
| C | 4.315000  | 6.784000 | 3.645100  |
| C | 5.752100  | 7.441000 | 6.050300  |
| C | 3.576400  | 5.753200 | 6.138700  |
| C | 6.131500  | 4.817500 | 7.025200  |
| C | 8.820200  | 3.990400 | 6.564300  |
| C | 6.851100  | 2.095700 | 6.820100  |
| C | 8.229000  | 2.109500 | 4.401400  |
| C | 7.211400  | 1.414400 | 1.950700  |
| C | 9.107300  | 3.320600 | 1.988900  |
| C | 4.101400  | 2.771500 | 5.907400  |
| C | 2.902300  | 3.294000 | 3.535800  |
| C | 4.817700  | 1.197600 | 3.792400  |
| O | 10.544100 | 4.072100 | -3.048900 |
| O | 9.624100  | 2.635400 | -6.408900 |
| O | 10.525300 | 6.898400 | -5.715300 |
| O | 7.609400  | 5.575400 | -7.926300 |
| O | 5.337000  | 8.673100 | -6.753400 |
| O | 3.797300  | 4.650800 | -7.845100 |
| O | 2.556900  | 6.477500 | -4.987800 |
| O | 2.036300  | 3.933400 | -2.126800 |
| O | 3.556600  | 7.739500 | -1.251700 |
| O | 9.186400  | 6.163900 | -0.189900 |
| O | 8.527100  | 1.723900 | -1.099000 |
| O | 7.230000  | 0.442700 | -3.685500 |
| O | 3.131300  | 1.943700 | -4.499700 |
| O | 6.253400  | 2.351500 | -7.251000 |
| O | 2.681500  | 5.280300 | 0.887100  |
| O | 6.249800  | 7.861000 | 0.760700  |
| O | 3.571400  | 7.701000 | 3.592000  |
| O | 6.004200  | 8.476800 | 6.512900  |
| O | 2.546600  | 5.827100 | 6.672400  |
| O | 6.037900  | 4.945900 | 8.197000  |
| O | 9.818200  | 4.217100 | 7.115300  |
| O | 6.717300  | 1.202300 | 7.549500  |
| O | 8.930800  | 1.194900 | 4.667100  |
| O | 7.226300  | 0.351600 | 1.480200  |

|    |           |          |           |
|----|-----------|----------|-----------|
| O  | 10.178700 | 3.431400 | 1.545500  |
| O  | 3.622400  | 2.494700 | 6.933000  |
| O  | 1.763300  | 3.346600 | 3.301400  |
| O  | 4.780800  | 0.040400 | 3.668600  |
| Te | 7.685300  | 5.652600 | 3.848500  |
| Te | 6.911100  | 6.840500 | -3.370000 |
| Ru | 8.264400  | 4.964700 | -4.960100 |
| Ru | 5.569600  | 5.820800 | -5.643000 |
| Ru | 4.568700  | 5.427700 | -2.984400 |
| Ru | 7.640500  | 4.437000 | -2.212300 |
| Ru | 5.941700  | 3.168500 | -4.315400 |
| Ru | 5.309700  | 5.474500 | 2.444500  |
| Ru | 7.424400  | 3.089500 | 2.839900  |
| Ru | 7.178100  | 3.576300 | 5.678900  |
| Ru | 5.281100  | 5.743500 | 5.306200  |
| Ru | 4.715000  | 3.083000 | 4.128300  |
| Cu | 5.365100  | 3.211400 | -1.547700 |
| Cu | 5.078200  | 2.953200 | 1.398300  |
| Cu | 6.754400  | 4.586100 | 0.321300  |
| Cl | 4.227500  | 1.689500 | -0.284600 |

[[TeRu<sub>5</sub>(CO)<sub>14</sub>]<sub>2</sub>Cu<sub>3</sub>Cl] (**1''**, S = 0) (DMol<sup>3</sup>)

Total energy = -5194.9146189 a.u.

|   | x         | y        | z         |
|---|-----------|----------|-----------|
| C | 9.375400  | 4.361800 | -3.411600 |
| C | 9.047600  | 3.658700 | -6.071500 |
| C | 9.405300  | 6.335400 | -5.562300 |
| C | 7.036800  | 5.508900 | -6.856700 |
| C | 5.073400  | 7.458000 | -6.370700 |
| C | 4.289900  | 4.887800 | -6.957500 |
| C | 3.402100  | 5.881700 | -4.481900 |
| C | 3.099000  | 4.205200 | -2.335500 |
| C | 3.919200  | 6.718600 | -1.819100 |
| C | 8.527700  | 5.587900 | -0.967400 |
| C | 8.195700  | 2.849100 | -1.521400 |
| C | 6.855200  | 1.448400 | -3.796900 |
| C | 4.185500  | 2.286200 | -4.320800 |
| C | 6.167000  | 2.666600 | -6.100100 |
| C | 3.775000  | 5.195000 | 1.485700  |
| C | 5.993600  | 6.869100 | 1.288200  |
| C | 4.334800  | 6.796300 | 3.597800  |
| C | 5.634300  | 7.440300 | 6.136800  |
| C | 3.482900  | 5.707600 | 5.995600  |
| C | 5.986000  | 4.812200 | 7.039800  |
| C | 8.733600  | 4.281900 | 6.774700  |
| C | 6.969500  | 2.177900 | 6.872700  |
| C | 8.480800  | 2.313200 | 4.542800  |
| C | 7.506300  | 1.472900 | 2.125000  |
| C | 9.222300  | 3.517900 | 2.041100  |
| C | 4.198400  | 2.695600 | 5.844400  |
| C | 3.002400  | 3.166500 | 3.490000  |
| C | 5.016300  | 1.150700 | 3.780900  |
| O | 10.511500 | 4.080500 | -3.277900 |
| O | 9.636000  | 2.880300 | -6.694000 |
| O | 10.180300 | 7.143400 | -5.858200 |
| O | 7.327400  | 5.596300 | -7.996100 |
| O | 4.872500  | 8.510800 | -6.811800 |
| O | 3.610000  | 4.429200 | -7.775200 |
| O | 2.336500  | 6.194200 | -4.870100 |
| O | 2.138100  | 3.652300 | -1.992400 |

|    |           |           |           |   |          |           |           |
|----|-----------|-----------|-----------|---|----------|-----------|-----------|
| O  | 3.506700  | 7.605500  | -1.195200 | C | 8.968400 | 4.155500  | 6.455800  |
| O  | 9.249900  | 6.285300  | -0.366600 | C | 7.044200 | 2.271300  | 6.874300  |
| O  | 8.662100  | 1.894000  | -1.054500 | C | 8.229600 | 2.292400  | 4.381600  |
| O  | 7.356000  | 0.417000  | -3.620200 | C | 7.335400 | 1.639100  | 1.891100  |
| O  | 3.174600  | 1.729100  | -4.433900 | C | 9.239100 | 3.560700  | 2.126200  |
| O  | 6.257600  | 2.276100  | -7.191200 | C | 4.170400 | 2.627600  | 5.987300  |
| O  | 2.762000  | 5.171400  | 0.918000  | C | 3.007200 | 2.959600  | 3.492800  |
| O  | 6.246200  | 7.862800  | 0.730100  | C | 4.976000 | 1.114900  | 3.824100  |
| O  | 3.573800  | 7.687500  | 3.479500  | O | 0.531400 | 4.100600  | -3.156400 |
| O  | 5.841600  | 8.449300  | 6.666700  | O | 9.709400 | 2.896700  | -6.604400 |
| O  | 2.414100  | 5.710700  | 6.441100  | O | 0.336700 | 7.121200  | -5.750800 |
| O  | 5.759800  | 4.891000  | 8.194000  | O | 7.491900 | 5.655000  | -7.946400 |
| O  | 9.653800  | 4.612100  | 7.399000  | O | 5.075100 | 8.623900  | -6.770700 |
| O  | 6.878200  | 1.265500  | 7.580100  | O | 3.737000 | 4.554000  | -7.832500 |
| O  | 9.270400  | 1.503600  | 4.876500  | O | 2.439000 | 6.310900  | -4.942900 |
| O  | 7.599700  | 0.410400  | 1.665100  | O | 2.085700 | 3.732200  | -2.144200 |
| O  | 10.240600 | 3.660200  | 1.501000  | O | 3.518900 | 7.603900  | -1.200400 |
| O  | 3.707000  | 2.411000  | 6.857600  | O | 9.174300 | 6.264900  | -0.244400 |
| O  | 1.871100  | 3.154300  | 3.232300  | O | 8.627400 | 1.847200  | -1.067300 |
| O  | 5.027000  | -0.002800 | 3.656700  | O | 7.345000 | 0.431000  | -3.687500 |
| Te | 7.711700  | 5.780000  | 3.930700  | O | 3.220400 | 1.787300  | -4.483400 |
| Te | 6.767300  | 6.853200  | -3.460500 | O | 6.316100 | 2.345700  | -7.243700 |
| Ru | 8.144800  | 4.996600  | -5.052400 | O | 2.713100 | 5.001600  | 0.852600  |
| Ru | 5.383500  | 5.721000  | -5.638000 | O | 5.885500 | 8.050000  | 0.977000  |
| Ru | 4.527000  | 5.314100  | -2.961500 | O | 3.099200 | 7.177100  | 3.663700  |
| Ru | 7.645200  | 4.504900  | -2.296600 | O | 5.587400 | 8.601100  | 6.317600  |
| Ru | 5.932500  | 3.081800  | -4.253900 | O | 2.580900 | 5.528800  | 6.872800  |
| Ru | 5.398500  | 5.458200  | 2.449800  | O | 6.232700 | 5.130300  | 8.220500  |
| Ru | 7.594800  | 3.179000  | 2.976400  | O | 9.980500 | 4.399400  | 6.962400  |
| Ru | 7.217900  | 3.705600  | 5.761400  | O | 6.963100 | 1.399700  | 7.631800  |
| Ru | 5.244500  | 5.778700  | 5.268400  | O | 8.901600 | 1.340700  | 4.571200  |
| Ru | 4.834500  | 3.040300  | 4.077200  | O | 7.419200 | 0.563700  | 1.461700  |
| Cu | 5.474200  | 3.187600  | -1.504400 | O | 0.330500 | 3.654800  | 1.744100  |
| Cu | 5.358500  | 3.002300  | 1.376200  | O | 3.728000 | 2.320400  | 7.015200  |
| Cu | 6.675100  | 4.878400  | 0.170700  | O | 1.895600 | 2.902100  | 3.163600  |
| Cl | 4.556600  | 1.595300  | -0.190700 | O | 5.034100 | -0.035400 | 3.684200  |

[{TeRu<sub>5</sub>(CO)<sub>14</sub>]<sub>2</sub>Cu<sub>3</sub>Cl] (**1''**, *S* = 1) (DMol<sup>3</sup>)  
Total energy = -5194.9145050 a.u.

|   | x        | y        | z         |
|---|----------|----------|-----------|
| C | 9.398500 | 4.384000 | -3.323500 |
| C | 9.119000 | 3.683100 | -5.993000 |
| C | 9.524500 | 6.347200 | -5.462500 |
| C | 7.172600 | 5.565300 | -6.814800 |
| C | 5.238200 | 7.556800 | -6.349400 |
| C | 4.410800 | 4.994200 | -6.999900 |
| C | 3.500400 | 5.973200 | -4.558100 |
| C | 3.071400 | 4.267000 | -2.441800 |
| C | 3.937500 | 6.728900 | -1.838600 |
| C | 8.490100 | 5.563500 | -0.886000 |
| C | 8.167600 | 2.817000 | -1.513200 |
| C | 6.882200 | 1.482100 | -3.855300 |
| C | 4.232500 | 2.343600 | -4.372200 |
| C | 6.216300 | 2.726200 | -6.150000 |
| C | 3.723800 | 5.068700 | 1.422200  |
| C | 5.662700 | 7.044900 | 1.515200  |
| C | 4.039400 | 6.468400 | 3.726600  |
| C | 5.469700 | 7.510300 | 5.949200  |
| C | 3.584100 | 5.549300 | 6.295200  |
| C | 6.239900 | 4.955600 | 7.056400  |

|    |          |          |           |
|----|----------|----------|-----------|
| Te | 7.627700 | 5.870600 | 3.865900  |
| Te | 6.817900 | 6.870500 | -3.402200 |
| Ru | 8.218500 | 5.035000 | -4.992100 |
| Ru | 5.476800 | 5.795000 | -5.637900 |
| Ru | 4.551700 | 5.345700 | -2.993800 |
| Ru | 7.648300 | 4.498100 | -2.248600 |
| Ru | 5.982000 | 3.129000 | -4.301700 |
| Ru | 5.291900 | 5.430800 | 2.448500  |
| Ru | 7.466200 | 3.335200 | 2.768900  |
| Ru | 7.276200 | 3.727800 | 5.664600  |
| Ru | 5.234500 | 5.701800 | 5.351000  |
| Ru | 4.783000 | 2.981200 | 4.202400  |
| Cu | 5.405300 | 3.223900 | -1.535700 |
| Cu | 5.138200 | 2.869600 | 1.452300  |
| Cu | 6.721200 | 4.625500 | 0.298300  |
| Cl | 4.396400 | 1.611100 | -0.287500 |

[TeRu<sub>5</sub>(μ-CO)<sub>2</sub>(CO)<sub>12</sub>(CuMeCN)<sub>2</sub>] (**3a**) (DMol<sup>3</sup>)  
Total energy = -2731.7844680 a.u.

|   | x        | y        | z        |
|---|----------|----------|----------|
| C | 4.276700 | 0.487000 | 5.245700 |
| C | 6.821900 | 1.522300 | 6.176100 |
| C | 4.617200 | 2.661400 | 7.067300 |



|    |          |           |           |    |           |          |           |
|----|----------|-----------|-----------|----|-----------|----------|-----------|
| C  | 7.484600 | 4.686100  | 4.802800  | C  | -0.525500 | 3.539500 | 1.938100  |
| C  | 5.503400 | 6.445700  | 3.815300  | C  | 3.470000  | 6.942300 | 5.483600  |
| C  | 7.254400 | 5.144900  | 2.042700  | C  | 5.238600  | 5.227900 | 4.256400  |
| C  | 2.192900 | 2.928700  | 5.205100  | C  | 3.056800  | 4.096300 | 5.481900  |
| C  | 2.531600 | 5.495800  | 4.151100  | C  | -4.030100 | 6.099200 | 3.220700  |
| C  | 1.775700 | 3.339400  | 2.529600  | C  | -5.479300 | 6.020200 | 3.288100  |
| C  | 3.472000 | 3.917100  | 0.042600  | H  | -5.783800 | 4.978600 | 3.448500  |
| C  | 5.826100 | 2.757300  | -0.208200 | H  | -5.921900 | 6.382000 | 2.352800  |
| C  | 3.614000 | 1.257800  | 0.996700  | H  | -5.847700 | 6.632800 | 4.119800  |
| C  | 2.185200 | 0.308500  | 3.295800  | C  | -0.357500 | 6.155000 | 7.938500  |
| C  | 4.603700 | -0.818300 | 2.709300  | C  | -0.811300 | 6.281200 | 9.312000  |
| C  | 4.296400 | 6.910700  | 8.026400  | H  | -1.388100 | 7.205800 | 9.434000  |
| C  | 2.943300 | 8.115200  | 0.656800  | H  | 0.054600  | 6.312400 | 9.984400  |
| C  | 2.340700 | 9.309800  | 0.093500  | H  | -1.438300 | 5.423500 | 9.583300  |
| H  | 2.047800 | 9.124800  | -0.947100 | N  | -2.863400 | 6.144300 | 3.176200  |
| H  | 3.057500 | 10.139100 | 0.117500  | N  | 0.016800  | 6.069800 | 6.836100  |
| H  | 1.453600 | 9.587500  | 0.674600  | O  | 0.830700  | 9.156100 | 5.219100  |
| Cu | 4.613900 | 4.829100  | 5.764700  | O  | -0.605100 | 9.002000 | 1.205400  |
| Cu | 4.069900 | 5.519800  | 1.916500  | O  | 3.159400  | 9.757100 | 2.331400  |
| N  | 4.424700 | 6.097500  | 7.200200  | O  | 4.618800  | 8.206000 | -0.998000 |
| N  | 3.413300 | 7.148200  | 1.110100  | O  | 6.433000  | 8.141200 | 2.962500  |
| O  | 3.950200 | -0.411700 | 5.943300  | O  | 6.276300  | 5.008200 | 0.648500  |
| O  | 7.749700 | 1.068600  | 6.714600  | O  | 3.719000  | 2.335100 | -0.851000 |
| O  | 4.247200 | 2.764800  | 8.171600  | O  | 5.569000  | 2.006400 | 3.115900  |
| O  | 8.370500 | 4.792400  | 5.547600  | O  | 2.038600  | 1.381000 | 2.677600  |
| O  | 5.342200 | 7.585200  | 4.030700  | O  | -0.283500 | 2.829300 | 5.357900  |
| O  | 8.002100 | 5.467300  | 1.215800  | O  | -1.410700 | 3.060100 | 1.347400  |
| O  | 1.475600 | 2.537900  | 6.035200  | O  | 3.654500  | 7.763800 | 6.292200  |
| O  | 1.954600 | 6.486300  | 4.397400  | O  | 6.379000  | 5.059900 | 4.421400  |
| O  | 0.816000 | 3.160000  | 1.894600  | O  | 2.985100  | 3.235900 | 6.266400  |
| O  | 2.763900 | 4.350300  | -0.781000 | Cu | -0.961000 | 6.137700 | 3.166200  |
| O  | 6.551100 | 2.606400  | -1.107300 | Cu | 0.828500  | 5.890800 | 5.095500  |
| O  | 3.048500 | 0.643400  | 0.158500  | Ru | 1.384800  | 7.324000 | 2.826000  |
| O  | 1.104100 | -0.109100 | 3.382900  | Ru | 3.987800  | 6.823000 | 1.679800  |
| O  | 4.981000 | -1.886800 | 2.454000  | Ru | 3.608600  | 3.935100 | 1.778000  |
| Ru | 5.286400 | 2.243200  | 5.339100  | Ru | 0.951600  | 4.214300 | 2.917900  |
| Ru | 6.098400 | 4.644500  | 3.484600  | Ru | 3.347600  | 5.506100 | 4.217700  |
| Ru | 3.963900 | 0.927600  | 3.130400  | Te | 1.672700  | 5.625300 | 0.646700  |
| Ru | 4.629800 | 2.998800  | 1.236600  |    |           |          |           |
| Ru | 3.175200 | 3.719800  | 3.771300  |    |           |          |           |
| Te | 6.592800 | 1.999800  | 2.909400  |    |           |          |           |
| C  | 4.126000 | 7.924800  | 9.053400  |    |           |          |           |
| H  | 4.116900 | 7.453000  | 10.042900 |    |           |          |           |
| H  | 4.951200 | 8.645400  | 9.008500  |    |           |          |           |
| H  | 3.178700 | 8.455100  | 8.899600  |    |           |          |           |

[TeRu<sub>5</sub>(μ-CO)<sub>3</sub>(CO)<sub>11</sub>Cu<sub>2</sub>(MeCN)<sub>2</sub>] (**3b**) (DMol<sup>3</sup>)  
Total energy = -2731.7827685 a.u.

|   | x        | y        | z         |
|---|----------|----------|-----------|
| C | 1.042000 | 8.384500 | 4.368200  |
| C | 0.117900 | 8.322500 | 1.820600  |
| C | 2.910700 | 8.602500 | 2.324900  |
| C | 4.359200 | 7.669200 | -0.001800 |
| C | 5.503700 | 7.618400 | 2.504000  |
| C | 5.202700 | 5.162200 | 1.114400  |
| C | 3.676600 | 2.950000 | 0.133900  |
| C | 4.843000 | 2.772900 | 2.631800  |
| C | 2.080500 | 2.556300 | 2.565700  |
| C | 0.228200 | 3.425200 | 4.492100  |

[TeRu<sub>5</sub>(μ-CO)<sub>2</sub>(CO)<sub>12</sub>(CuMeCN)<sub>2</sub>] (**3a**)  
(MPW1PW91/LanL2DZ, Gaussian 03)  
G = -2721.798938 a.u.

|   | x         | y         | z         |
|---|-----------|-----------|-----------|
| C | 2.312396  | -2.234983 | -0.894914 |
| C | 1.327832  | -3.293723 | 1.610624  |
| C | -0.193079 | -3.551219 | -0.504542 |
| C | -1.222481 | -1.365723 | 2.812704  |
| C | -2.889667 | 0.114076  | 1.110902  |
| C | -1.107666 | 1.465348  | 2.804777  |
| C | -0.056348 | -1.364695 | -2.549035 |
| C | -2.320464 | 0.094258  | -1.823541 |
| C | 0.043840  | 1.394226  | -2.534990 |
| C | 0.096067  | 3.564335  | -0.465939 |
| C | 1.599501  | 3.162435  | 1.636743  |
| C | 2.485821  | 2.046209  | -0.878392 |
| C | 2.755885  | -0.100139 | -2.696287 |
| C | 4.202522  | -0.168979 | -0.389492 |
| C | -4.304091 | -3.776601 | -0.732585 |
| C | -4.005934 | 4.080933  | -0.766292 |

|    |           |           |           |    |           |           |           |
|----|-----------|-----------|-----------|----|-----------|-----------|-----------|
| C  | -4.974825 | 5.089143  | -1.166486 | H  | -5.527799 | 4.840533  | -1.493902 |
| H  | -4.461998 | 6.023632  | -1.407480 | H  | -4.489173 | 5.766644  | -0.389537 |
| H  | -5.685413 | 5.274172  | -0.357290 | H  | -5.824081 | 4.791765  | 0.259888  |
| H  | -5.524616 | 4.751391  | -2.048436 | N  | -4.454039 | -2.038258 | 0.263934  |
| Cu | -1.914815 | -1.843932 | -0.103529 | N  | -3.427851 | 2.789960  | -0.299024 |
| Cu | -1.760042 | 1.997071  | -0.096595 | O  | -2.823149 | 0.987037  | -3.119824 |
| N  | -3.467262 | -3.018028 | -0.439563 | O  | -2.089612 | -3.126295 | -2.543419 |
| N  | -3.223889 | 3.273080  | -0.454279 | O  | 0.591894  | -0.439609 | -4.140283 |
| O  | 2.983594  | -3.075013 | -1.419483 | O  | 3.385177  | -2.980439 | -2.683652 |
| O  | 1.715569  | -4.051620 | 2.420547  | O  | 3.573220  | 1.378128  | -3.279534 |
| O  | -0.621682 | -4.543020 | -0.981967 | O  | 4.800995  | -0.354337 | -0.025124 |
| O  | -1.392508 | -2.187961 | 3.631728  | O  | 3.464109  | -2.198476 | 3.270254  |
| O  | -4.070568 | 0.161915  | 1.043078  | O  | 3.689937  | 2.155220  | 2.713889  |
| O  | -1.214613 | 2.299322  | 3.622864  | O  | 0.725641  | 0.689858  | 4.092936  |
| O  | 0.121120  | -2.151319 | -3.405958 | O  | -2.737342 | 1.769683  | 2.851770  |
| O  | -3.394617 | 0.137045  | -2.321938 | O  | -1.967501 | -2.351528 | 3.363175  |
| O  | 0.278492  | 2.175132  | -3.383385 | O  | -0.307266 | 3.177654  | -2.709178 |
| O  | -0.251365 | 4.593773  | -0.929484 | O  | 3.365933  | 3.067450  | -0.439090 |
| O  | 2.052372  | 3.878692  | 2.450648  | O  | -0.264480 | 3.789215  | 1.783116  |
| O  | 3.221954  | 2.833594  | -1.397634 | Cu | -2.751056 | -1.098466 | 0.207573  |
| O  | 3.031408  | -0.105796 | -3.834080 | Cu | -1.974735 | 1.444981  | -0.154631 |
| O  | 5.337327  | -0.216114 | -0.104675 | Ru | -0.786492 | -0.577651 | -1.443772 |
| Ru | 0.701347  | -2.095345 | 0.299692  | Ru | 2.059629  | -0.508778 | -1.407013 |
| Ru | -1.033174 | 0.040816  | 1.548882  | Ru | 2.105925  | -0.128876 | 1.436066  |
| Ru | 2.361575  | -0.092150 | -0.855075 | Ru | -0.736981 | -0.178467 | 1.582918  |
| Ru | 0.869972  | 2.031073  | 0.319744  | Ru | 0.653466  | 1.646403  | -0.222501 |
| Ru | -0.472104 | 0.025434  | -1.333080 | Te | 0.608763  | -2.142561 | 0.280079  |
| Te | 1.658750  | -0.075787 | 1.854258  |    |           |           |           |
| C  | -5.339794 | -4.727434 | -1.105073 |    |           |           |           |
| H  | -4.890798 | -5.699039 | -1.325888 |    |           |           |           |
| H  | -6.055451 | -4.846846 | -0.288058 |    |           |           |           |
| H  | -5.871895 | -4.375019 | -1.992068 |    |           |           |           |

Intermediate II (MPW1PW91/LanL2DZ, Gaussian 03)

G = - 2721.796720 a.u.

[TeRu<sub>5</sub>(μ-CO)<sub>3</sub>(CO)<sub>11</sub>Cu<sub>2</sub>(MeCN)<sub>2</sub>] (3b)  
(MPW1PW91/LanL2DZ, Gaussian 03)  
G = - 2721.800041 a.u.

|   | x         | y         | z         |    | x         | y         | z         |
|---|-----------|-----------|-----------|----|-----------|-----------|-----------|
| C | -2.040478 | 0.461136  | -2.409331 | C  | -2.669176 | 1.936656  | -0.748552 |
| C | -1.600539 | -2.150931 | -2.097017 | C  | -1.703747 | 3.083257  | 1.726364  |
| C | 0.561993  | -0.479088 | -2.946482 | C  | -0.337501 | 3.561584  | -0.484073 |
| C | 2.882489  | -2.047174 | -2.185386 | C  | 1.213649  | 0.682337  | 3.217691  |
| C | 2.988869  | 0.683898  | -2.541062 | C  | 2.897591  | 0.329821  | 1.185510  |
| C | 3.607999  | -0.345615 | -0.007354 | C  | 1.203184  | -1.914954 | 1.858224  |
| C | 2.949478  | -1.420211 | 2.562074  | C  | -0.274479 | 1.485521  | -2.566794 |
| C | 3.077981  | 1.303324  | 2.195982  | C  | 2.213197  | 0.470747  | -1.840626 |
| C | 0.656894  | 0.324875  | 2.957376  | C  | 0.119697  | -1.251114 | -2.657618 |
| C | -1.970662 | 1.077063  | 2.280665  | C  | 0.384466  | -3.518768 | -0.535175 |
| C | -1.509869 | -1.526331 | 2.657039  | C  | -1.278770 | -3.376384 | 1.559341  |
| C | 0.006450  | 2.544771  | -1.766445 | C  | -2.133151 | -2.294280 | -0.925953 |
| C | 2.366202  | 2.455614  | -0.348144 | C  | -2.823368 | -0.186702 | -2.595662 |
| C | 0.033934  | 2.926257  | 1.038586  | C  | -4.186560 | -0.456613 | -0.230280 |
| C | -5.408461 | -2.712395 | 0.272118  | C  | 3.797555  | 4.365894  | -0.455352 |
| C | -6.591380 | -3.559541 | 0.279934  | C  | 4.599486  | -3.368415 | -0.786041 |
| H | -6.917765 | -3.742149 | 1.306701  | C  | 5.766875  | -4.227265 | -0.905207 |
| H | -6.366432 | -4.518642 | -0.193347 | H  | 5.477910  | -5.194754 | -1.323161 |
| H | -7.404601 | -3.079207 | -0.269627 | H  | 6.215448  | -4.388112 | 0.078165  |
| C | -4.154963 | 3.697241  | -0.392598 | H  | 6.509090  | -3.766223 | -1.561316 |
| C | -5.050787 | 4.836959  | -0.510784 | Cu | 1.595492  | 2.149844  | -0.032673 |
|   |           |           |           | Cu | 2.040723  | -1.604650 | -0.495388 |
|   |           |           |           | N  | 3.023841  | 3.514565  | -0.259450 |
|   |           |           |           | N  | 3.660505  | -2.684068 | -0.686222 |
|   |           |           |           | O  | -3.513690 | 2.625750  | -1.237432 |
|   |           |           |           | O  | -2.113126 | 3.772973  | 2.585487  |
|   |           |           |           | O  | -0.055041 | 4.604996  | -0.961353 |
|   |           |           |           | O  | 1.335704  | 1.103808  | 4.307094  |

|    |           |           |           |
|----|-----------|-----------|-----------|
| O  | 4.070484  | 0.486512  | 1.153029  |
| O  | 1.769883  | -2.749103 | 2.506321  |
| O  | -0.591501 | 2.260806  | -3.391917 |
| O  | 3.273517  | 0.690550  | -2.327466 |
| O  | 0.001238  | -2.048269 | -3.514417 |
| O  | 0.820270  | -4.471919 | -1.070140 |
| O  | -1.749680 | -4.165591 | 2.284598  |
| O  | -2.660765 | -3.214092 | -1.473877 |
| O  | -3.139257 | -0.157557 | -3.722102 |
| O  | -5.306246 | -0.586780 | 0.085986  |
| Ru | -1.015314 | 2.003114  | 0.342337  |
| Ru | 1.052758  | 0.018585  | 1.459592  |
| Ru | -2.368835 | -0.251851 | -0.765975 |
| Ru | -0.486851 | -2.114399 | 0.390069  |
| Ru | 0.379109  | 0.143675  | -1.394273 |
| Te | -1.626275 | -0.120184 | 1.908524  |
| C  | 4.759318  | 5.427303  | -0.709540 |
| H  | 4.243898  | 6.318046  | -1.077183 |
| H  | 5.292878  | 5.682182  | 0.209315  |
| H  | 5.484332  | 5.104387  | -1.460619 |

Intermediate **I2** (MPW1PW91/LanL2DZ, Gaussian 03)

G = - 2721.774846 a.u.

|    | x         | y         | z         |
|----|-----------|-----------|-----------|
| C  | -2.178222 | 2.509643  | -0.573459 |
| C  | -0.801115 | 3.131085  | 1.944869  |
| C  | 0.432800  | 3.450664  | -0.338239 |
| C  | 0.971684  | -0.830369 | 3.362976  |
| C  | 2.798057  | -0.141602 | 1.681025  |
| C  | 0.863618  | -2.402016 | 0.965385  |
| C  | 0.936162  | 1.416575  | -2.356800 |
| C  | 1.545153  | -1.298344 | -2.298522 |
| C  | -0.912036 | -0.657687 | -2.737879 |
| C  | -0.650415 | -3.317817 | -1.127319 |
| C  | -1.923582 | -3.250380 | 1.341288  |
| C  | -2.901796 | -1.715453 | -0.865150 |
| C  | -3.259124 | 0.731288  | -2.396932 |
| C  | -4.243248 | 0.608523  | 0.071768  |
| C  | 4.337349  | 3.559146  | -0.415748 |
| C  | 5.217664  | -2.687313 | -0.714805 |
| C  | 6.334855  | -3.615793 | -0.784654 |
| H  | 7.102336  | -3.237086 | -1.463857 |
| H  | 5.988432  | -4.585528 | -1.150653 |
| H  | 6.773060  | -3.750319 | 0.207224  |
| Cu | 2.004289  | 1.503073  | 0.052937  |
| Cu | 2.602682  | -0.986261 | -0.480329 |
| N  | 3.587553  | 2.683595  | -0.232368 |
| N  | 4.313897  | -1.952481 | -0.650828 |
| O  | -2.790365 | 3.450925  | -0.985885 |
| O  | -0.949861 | 3.816993  | 2.887552  |
| O  | 0.928382  | 4.433521  | -0.764155 |
| O  | 1.036176  | -1.058250 | 4.513362  |
| O  | 3.909399  | 0.047974  | 2.066851  |
| O  | 1.522833  | -3.405836 | 1.053270  |
| O  | 1.296439  | 2.259743  | -3.099817 |
| O  | 2.024483  | -1.963042 | -3.156215 |
| O  | -1.434644 | -1.085234 | -3.706158 |
| O  | -0.374392 | -4.163250 | -1.889104 |
| O  | -2.405093 | -4.038941 | 2.061431  |

|    |           |           |           |
|----|-----------|-----------|-----------|
| O  | -3.769106 | -2.377577 | -1.345316 |
| O  | -3.778487 | 0.999639  | -3.408040 |
| O  | -5.301650 | 0.771481  | 0.544200  |
| Ru | -0.542767 | 2.033296  | 0.440085  |
| Ru | 0.937685  | -0.483528 | 1.502806  |
| Ru | -2.529635 | 0.360008  | -0.683784 |
| Ru | -1.107404 | -2.005129 | 0.147259  |
| Ru | 0.307426  | -0.101565 | -1.403198 |
| Te | -1.660369 | 0.054644  | 1.926490  |
| C  | 5.252164  | 4.664727  | -0.652174 |
| H  | 4.696411  | 5.527459  | -1.028354 |
| H  | 5.754208  | 4.945737  | 0.276795  |
| H  | 6.006279  | 4.382855  | -1.390886 |

TS (MPW1PW91/LanL2DZ, Gaussian 03)

G = - 2721.770974 a.u.

|    | x         | y         | z         |
|----|-----------|-----------|-----------|
| C  | -1.542814 | 2.676430  | -1.156970 |
| C  | -0.035880 | 3.458968  | 1.236929  |
| C  | 1.206740  | 2.952681  | -1.041854 |
| C  | 0.814629  | -0.569877 | 3.413280  |
| C  | 2.709728  | -0.823000 | 1.705057  |
| C  | 0.272201  | -2.467252 | 1.296642  |
| C  | 1.173963  | 0.510737  | -2.583068 |
| C  | 0.957731  | -2.210630 | -1.762420 |
| C  | -1.185285 | -0.967986 | -2.635551 |
| C  | -1.639030 | -3.320173 | -0.517562 |
| C  | -2.610703 | -2.486131 | 1.921372  |
| C  | -3.342728 | -1.163236 | -0.520919 |
| C  | -3.189452 | 0.914951  | -2.507495 |
| C  | -3.989394 | 1.576086  | -0.059113 |
| C  | 5.103163  | 2.729716  | 0.148955  |
| C  | 5.032807  | -2.757369 | -1.371982 |
| C  | 6.104865  | -3.647631 | -1.788586 |
| H  | 6.750597  | -3.883690 | -0.939353 |
| H  | 6.705095  | -3.178751 | -2.572051 |
| H  | 5.682705  | -4.577234 | -2.178777 |
| Cu | 2.345039  | 1.245812  | 0.367436  |
| Cu | 2.472118  | -1.180400 | -0.506700 |
| N  | 4.144859  | 2.069043  | 0.240500  |
| N  | 4.163043  | -2.055041 | -1.037345 |
| O  | -1.891788 | 3.618365  | -1.805518 |
| O  | -0.005709 | 4.354122  | 1.998955  |
| O  | 1.914333  | 3.655225  | -1.673567 |
| O  | 0.845620  | -0.593296 | 4.587161  |
| O  | 3.808247  | -1.003086 | 2.133548  |
| O  | 0.688091  | -3.573801 | 1.493614  |
| O  | 1.779078  | 1.037810  | -3.446321 |
| O  | 1.262046  | -3.263898 | -2.209668 |
| O  | -1.813711 | -1.415058 | -3.529343 |
| O  | -1.689068 | -4.329861 | -1.106718 |
| O  | -3.210951 | -2.980135 | 2.797702  |
| O  | -4.379746 | -1.660131 | -0.839741 |
| O  | -3.703137 | 1.090188  | -3.541651 |
| O  | -4.932231 | 2.110130  | 0.384321  |
| Ru | -0.069083 | 2.031882  | 0.010305  |
| Ru | 0.830770  | -0.565181 | 1.518835  |
| Ru | -2.452574 | 0.732117  | -0.767317 |
| Ru | -1.611226 | -1.720936 | 0.485979  |
| Ru | 0.135738  | -0.518703 | -1.365895 |

|    |           |          |           |
|----|-----------|----------|-----------|
| Te | -1.530699 | 0.690377 | 1.841074  |
| C  | 6.288758  | 3.564170 | 0.028639  |
| H  | 6.279707  | 4.087998 | -0.930467 |
| H  | 6.309103  | 4.304635 | 0.832145  |
| H  | 7.192464  | 2.953240 | 0.090982  |

**Table S7** Cyclic voltammetry and differential pulse voltammetry of **1**, **3a**, and **3b**

| Cyclic Voltammetry             |                                                           | oxidation process                                          |                                                           | reduction process                                          |                          |
|--------------------------------|-----------------------------------------------------------|------------------------------------------------------------|-----------------------------------------------------------|------------------------------------------------------------|--------------------------|
| complex                        | $E_p^{\text{ox}}/\text{V}^a$                              | $E_p^{\text{red}}/\text{V}^b$                              | $E_p^{\text{ox}}/\text{V}^a$                              | $E_p^{\text{red}}/\text{V}^b$                              |                          |
| <b>1</b>                       | 0.225                                                     | - <sup>d</sup>                                             | -0.048                                                    |                                                            |                          |
|                                | ~ 0.363 <sup>e</sup>                                      | - <sup>d</sup>                                             | -0.199                                                    |                                                            |                          |
|                                |                                                           |                                                            |                                                           |                                                            | -0.894                   |
|                                |                                                           |                                                            |                                                           |                                                            | -1.144                   |
| <b>3a</b>                      | 0.117                                                     | - <sup>d</sup>                                             | -0.010                                                    |                                                            |                          |
|                                | 0.411 <sup>e</sup>                                        |                                                            | - <sup>d</sup>                                            |                                                            |                          |
|                                |                                                           |                                                            |                                                           |                                                            | -0.767                   |
|                                |                                                           |                                                            |                                                           |                                                            | -1.100                   |
| <b>3b</b>                      | 0.129                                                     | - <sup>d</sup>                                             | -0.030                                                    |                                                            |                          |
|                                |                                                           |                                                            | -0.120                                                    |                                                            |                          |
|                                |                                                           |                                                            |                                                           |                                                            | -1.810                   |
|                                |                                                           |                                                            |                                                           |                                                            | -0.799                   |
|                                |                                                           |                                                            |                                                           | -1.090                                                     |                          |
|                                |                                                           |                                                            | -1.720                                                    |                                                            | -1.830                   |
| Differential Pulse Voltammetry |                                                           | oxidation process                                          |                                                           | reduction process                                          |                          |
| complex                        | $E_p^{\text{ox}}/\text{V}^a$<br>( $W_{1/2}/\text{mV}^c$ ) | $E_p^{\text{red}}/\text{V}^b$<br>( $W_{1/2}/\text{mV}^c$ ) | $E_p^{\text{ox}}/\text{V}^a$<br>( $W_{1/2}/\text{mV}^c$ ) | $E_p^{\text{red}}/\text{V}^b$<br>( $W_{1/2}/\text{mV}^c$ ) |                          |
| <b>1</b>                       | ~ 0.133, 0.197 (184)                                      | 0.124, 0.184 (217)                                         | -0.339 <sup>f</sup> (163)                                 |                                                            |                          |
|                                | ~ 0.377 <sup>e</sup> (br)                                 | 0.366 <sup>e</sup> (96)                                    | -1.047 (183)                                              |                                                            | -0.674 (82)              |
|                                |                                                           |                                                            |                                                           |                                                            | -1.112 (174)             |
|                                |                                                           |                                                            |                                                           |                                                            | -1.294 (97)              |
| <b>3a</b>                      | 0.088 (78)                                                | 0.134 (119)                                                | -1.275 (116)                                              |                                                            |                          |
|                                | 0.388 <sup>e</sup> (120)                                  | 0.446 <sup>e</sup> (120)                                   | -1.375 (102)                                              |                                                            | -1.396 (108)             |
|                                |                                                           |                                                            | -1.743 (123)                                              |                                                            | -1.760 (122)             |
|                                |                                                           |                                                            | -1.905 <sup>g</sup> (116)                                 |                                                            | -1.916 <sup>g</sup> (91) |
| <b>3b</b>                      |                                                           |                                                            | -0.376 <sup>f</sup> (291)                                 |                                                            |                          |
|                                | 0.102 (88)                                                | 0.154 (120)                                                |                                                           |                                                            | -0.528 (102)             |
|                                | 0.414 <sup>e</sup> (128)                                  | - <sup>d,e</sup> (br)                                      |                                                           |                                                            | -0.680 (60)              |
|                                |                                                           |                                                            |                                                           |                                                            | -1.148 (141)             |
|                                |                                                           |                                                            | -1.376 (135)                                              |                                                            | -1.376 (108)             |
|                                |                                                           |                                                            | -1.770 (100)                                              |                                                            | -1.776 (85)              |
|                                |                                                           |                                                            | -0.376 <sup>f</sup> (333)                                 |                                                            |                          |
|                                |                                                           |                                                            |                                                           |                                                            | -0.636 (51)              |
|                                |                                                           |                                                            |                                                           |                                                            | -1.116 (br)              |
|                                |                                                           |                                                            | -1.354 (106)                                              |                                                            | -1.342 (111)             |
|                                |                                                           |                                                            | -1.770 (109)                                              |                                                            | -1.800 (98)              |

<sup>a</sup>  $E_p^{\text{ox}}$  = oxidative peak potential. <sup>b</sup>  $E_p^{\text{red}}$  = reductive peak potential. <sup>c</sup>  $W_{1/2}$  = width at half-height. <sup>d</sup> Difficult to determine. <sup>e</sup> A metal-centered Cu(I) → Cu(II) oxidation. <sup>f</sup> The irreversible desorption of Cu. <sup>g</sup> The interference of [PPh<sub>4</sub>]<sup>+</sup>.

**Table S8** Selected bond distances (Å) and bond angles (deg) for [PPh<sub>4</sub>]<sub>2</sub>[1], [PPh<sub>4</sub>]<sub>4</sub>[2]·3Et<sub>2</sub>O, **3a**, and **3b**·0.5CH<sub>2</sub>Cl<sub>2</sub>

| [PPh <sub>4</sub> ] <sub>2</sub> [1] |           |                   |           |
|--------------------------------------|-----------|-------------------|-----------|
| Te(1)—Ru(6)                          | 2.674(2)  | Te(1)—Ru(7)       | 2.663(2)  |
| Te(1)—Ru(8)                          | 2.744(2)  | Te(1)—Ru(9)       | 2.728(2)  |
| Te(2)—Ru(1)                          | 2.731(2)  | Te(2)—Ru(2)       | 2.748(2)  |
| Te(2)—Ru(3)                          | 2.675(2)  | Te(2)—Ru(4)       | 2.677(2)  |
| Ru(1)—Ru(2)                          | 2.832(2)  | Ru(1)—Ru(4)       | 2.834(2)  |
| Ru(2)—Ru(3)                          | 2.809(2)  | Ru(3)—Ru(4)       | 3.071(2)  |
| Ru(6)—Ru(7)                          | 3.070(2)  | Ru(6)—Ru(9)       | 2.839(2)  |
| Ru(7)—Ru(8)                          | 2.823(2)  | Ru(8)—Ru(9)       | 2.819(2)  |
| Ru(5)—Ru(1)                          | 2.826(2)  | Ru(5)—Ru(2)       | 2.889(2)  |
| Ru(5)—Ru(3)                          | 2.900(2)  | Ru(5)—Ru(4)       | 2.880(2)  |
| Ru(10)—Ru(6)                         | 2.890(2)  | Ru(10)—Ru(7)      | 2.912(2)  |
| Ru(10)—Ru(8)                         | 2.847(2)  | Ru(10)—Ru(9)      | 2.842(2)  |
| Cu(1)—Ru(3)                          | 2.653(3)  | Cu(1)—Ru(4)       | 2.693(3)  |
| Cu(1)—Ru(5)                          | 2.691(3)  | Cu(3)—Ru(4)       | 2.583(7)  |
| Cu(3)—Ru(6)                          | 2.568(7)  | Cu(2)—Ru(6)       | 2.670(3)  |
| Cu(2)—Ru(7)                          | 2.655(3)  | Cu(2)—Ru(10)      | 2.661(3)  |
| Cu(1)—Cu(3)                          | 2.600(7)  | Cu(1)—Cu(2)       | 2.938(4)  |
| Cu(2)—Cu(3)                          | 2.484(8)  | Cu(1)—Cl(1)       | 2.235(6)  |
| Cu(2)—Cl(1)                          | 2.218(6)  | Te(1)—Ru(7)       | 2.663(2)  |
|                                      |           |                   |           |
| Cu(2)—Ru(7)—Ru(10)                   | 56.89(7)  | Cu(1)—Ru(4)—Ru(1) | 116.46(9) |
| Cu(2)—Ru(7)—Cu(3)                    | 52.4(2)   | Cu(3)—Ru(4)—Ru(5) | 115.8(2)  |
| Te(1)—Ru(7)—Cu(3)                    | 83.9(2)   | Cu(1)—Ru(4)—Ru(5) | 57.63(7)  |
| Ru(8)—Ru(7)—Cu(3)                    | 136.9(2)  | Cu(3)—Ru(4)—Ru(3) | 78.0(2)   |
| Ru(10)—Ru(7)—Cu(3)                   | 97.9(2)   | Cu(1)—Ru(4)—Ru(3) | 54.33(7)  |
| Cu(2)—Ru(7)—Ru(6)                    | 55.03(7)  | Cu(1)—Ru(5)—Ru(1) | 116.81(9) |
| Cu(3)—Ru(7)—Ru(6)                    | 50.5(1)   | Cu(1)—Ru(5)—Ru(4) | 57.71(7)  |
| Cu(1)—Ru(3)—Te(2)                    | 110.58(8) | Cu(1)—Ru(5)—Ru(2) | 114.42(9) |
| Cu(1)—Ru(3)—Ru(2)                    | 118.40(9) | Cu(1)—Ru(5)—Ru(3) | 56.50(7)  |
| Cu(1)—Ru(3)—Ru(5)                    | 57.77(7)  | Cu(3)—Ru(6)—Cu(2) | 56.6(2)   |
| Cu(1)—Ru(3)—Ru(4)                    | 55.57(7)  | Cu(3)—Ru(6)—Te(1) | 91.3(2)   |
| Cu(3)—Ru(4)—Cu(1)                    | 59.0(2)   | Cu(2)—Ru(6)—Te(1) | 109.26(8) |
| Te(2)—Ru(4)—Cu(1)                    | 109.28(8) | Cu(3)—Ru(6)—Ru(9) | 147.0(2)  |
| Cu(3)—Ru(4)—Ru(1)                    | 163.4(2)  | Cu(2)—Ru(6)—Ru(9) | 116.16(9) |
| Cu(3)—Ru(6)—Ru(10)                   | 107.7(2)  | Cl(1)—Cu(2)—Ru(7) | 132.9(2)  |

|                    |           |                    |          |
|--------------------|-----------|--------------------|----------|
| Cu(2)—Ru(6)—Ru(10) | 57.03(7)  | Cu(3)—Cu(2)—Ru(7)  | 69.7(2)  |
| Cu(3)—Ru(6)—Ru(7)  | 62.1(2)   | Cl(1)—Cu(2)—Ru(10) | 136.7(2) |
| Cu(2)—Ru(6)—Ru(7)  | 54.55(7)  | Cu(3)—Cu(2)—Ru(10) | 118.0(2) |
| Cu(2)—Ru(7)—Te(1)  | 110.07(8) | Ru(7)—Cu(2)—Ru(10) | 66.43(8) |
| Cu(2)—Ru(7)—Ru(8)  | 116.23(8) | Cl(1)—Cu(2)—Ru(6)  | 149.2(2) |
| Cu(2)—Ru(10)—Ru(9) | 116.32(9) | Cu(3)—Cu(2)—Ru(6)  | 59.6(2)  |
| Cu(2)—Ru(10)—Ru(8) | 115.20(8) | Ru(7)—Cu(2)—Ru(6)  | 70.42(8) |
| Cu(2)—Ru(10)—Ru(6) | 57.32(7)  | Ru(10)—Cu(2)—Ru(6) | 65.64(8) |
| Cu(2)—Ru(10)—Ru(7) | 56.67(7)  | Cl(1)—Cu(2)—Cu(1)  | 49.0(2)  |
| Cl(1)—Cu(1)—Cu(3)  | 101.1(2)  | Cu(3)—Cu(2)—Cu(1)  | 56.6(2)  |
| Cl(1)—Cu(1)—Ru(3)  | 130.7(2)  | Ru(7)—Cu(2)—Cu(1)  | 111.6(1) |
| Cu(3)—Cu(1)—Ru(3)  | 85.9(2)   | Ru(10)—Cu(2)—Cu(1) | 174.0(1) |
| Cl(1)—Cu(1)—Ru(5)  | 136.0(2)  | Ru(6)—Cu(2)—Cu(1)  | 108.4(1) |
| Cu(3)—Cu(1)—Ru(5)  | 122.2(2)  | Cu(2)—Cu(3)—Ru(6)  | 63.8(2)  |
| Ru(3)—Cu(1)—Ru(5)  | 65.72(8)  | Cu(2)—Cu(3)—Ru(4)  | 131.0(3) |
| Cl(1)—Cu(1)—Ru(4)  | 152.5(2)  | Ru(6)—Cu(3)—Ru(4)  | 159.8(3) |
| Cu(3)—Cu(1)—Ru(4)  | 58.4(2)   | Cu(2)—Cu(3)—Cu(1)  | 70.6(2)  |
| Ru(3)—Cu(1)—Ru(4)  | 70.10(8)  | Ru(6)—Cu(3)—Cu(1)  | 123.5(3) |
| Ru(5)—Cu(1)—Ru(4)  | 64.67(8)  | Ru(4)—Cu(3)—Cu(1)  | 62.6(2)  |
| Cl(1)—Cu(1)—Cu(2)  | 48.5(2)   | Cu(2)—Cu(3)—Ru(7)  | 57.9(2)  |
| Cu(3)—Cu(1)—Cu(2)  | 52.9(2)   | Ru(6)—Cu(3)—Ru(7)  | 67.4(2)  |
| Ru(3)—Cu(1)—Cu(2)  | 114.9(1)  | Ru(4)—Cu(3)—Ru(7)  | 130.5(3) |
| Ru(5)—Cu(1)—Cu(2)  | 174.2(1)  | Cu(1)—Cu(3)—Ru(7)  | 113.3(3) |
| Ru(4)—Cu(1)—Cu(2)  | 109.8(1)  | Cu(2)—Cl(1)—Cu(1)  | 82.6(2)  |
| Cl(1)—Cu(2)—Cu(3)  | 105.3(2)  |                    |          |

[PPh<sub>4</sub>]<sub>4</sub>[2]·3Et<sub>2</sub>O

|                   |           |                   |          |
|-------------------|-----------|-------------------|----------|
| Te(1)—Ru(1)       | 2.722(2)  | Te(1)—Ru(2)       | 2.727(2) |
| Te(1)—Ru(3)       | 2.677(2)  | Te(1)—Ru(4)       | 2.678(2) |
| Te(2)—Ru(6)       | 2.736(2)  | Te(2)—Ru(7)       | 2.744(2) |
| Ru(1)—Ru(2)       | 2.804(2)  | Ru(1)—Ru(4)       | 2.862(2) |
| Ru(3)—Ru(2)       | 2.844(2)  | Ru(3)—Ru(4)       | 2.869(2) |
| Ru(5)—Ru(1)       | 2.878(2)  | Ru(5)—Ru(2)       | 2.888(2) |
| Ru(5)—Ru(3)       | 2.864(2)  | Ru(5)—Ru(4)       | 2.817(2) |
| Ru(6)—Ru(7)       | 2.969(2)  | Ru(6)—Ru(7a)      | 2.808(2) |
| Cu(1)—Ru(4)       | 2.608(2)  | Cu(1)—Ru(6)       | 2.694(2) |
| Cu(1)—Ru(7)       | 2.675(2)  | Te(1)—Cu(1)       | 2.912(2) |
|                   |           |                   |          |
| Ru(4)—Cu(1)—Ru(7) | 133.04(9) | Cu(1)—Ru(7)—Te(2) | 97.29(6) |

|                    |           |                    |           |
|--------------------|-----------|--------------------|-----------|
| Ru(4)—Cu(1)—Ru(6)  | 147.40(9) | Cu(1)—Ru(7)—Te(2a) | 97.61(7)  |
| Ru(7)—Cu(1)—Ru(6)  | 67.13(6)  | Cu(1)—Ru(7)—Ru(6a) | 146.44(7) |
| Ru(4)—Cu(1)—Te(1)  | 57.72(5)  | Cu(1)—Ru(7)—Ru(6)  | 56.74(5)  |
| Ru(7)—Cu(1)—Te(1)  | 168.66(8) | Cu(1)—Ru(4)—Ru(1)  | 123.16(6) |
| Ru(6)—Cu(1)—Te(1)  | 101.73(7) | Cu(1)—Ru(4)—Ru(3)  | 74.14(7)  |
| Cu(1)—Ru(4)—Te(1)  | 66.85(6)  | Ru(3)—Te(1)—Cu(1)  | 72.44(6)  |
| Cu(1)—Ru(4)—Ru(5)  | 134.60(8) | Ru(4)—Te(1)—Cu(1)  | 55.43(5)  |
| Cu(1)—Ru(6)—Te(2)  | 97.03(6)  | Ru(1)—Te(1)—Cu(1)  | 117.30(6) |
| Cu(1)—Ru(6)—Te(2a) | 97.34(6)  | Ru(2)—Te(1)—Cu(1)  | 135.00(6) |
| Cu(1)—Ru(6)—Ru(7a) | 146.42(7) |                    |           |
| Cu(1)—Ru(6)—Ru(7)  | 56.13(5)  |                    |           |

### 3a

|                   |           |                   |            |
|-------------------|-----------|-------------------|------------|
| Te(1)—Ru(1)       | 2.6721(3) | Te(1)—Ru(2)       | 2.6723(3)  |
| Te(1)—Ru(3)       | 2.6814(3) | Te(1)—Ru(4)       | 2.7616(3)  |
| Ru(1)—Ru(2)       | 2.9995(3) | Ru(1)—Ru(4)       | 2.8079(3)  |
| Ru(3)—Ru(2)       | 3.0022(3) | Ru(3)—Ru(4)       | 2.8044(3)  |
| Ru(5)—Ru(1)       | 2.8869(3) | Ru(5)—Ru(2)       | 2.9147(3)  |
| Ru(5)—Ru(3)       | 2.8986(3) | Ru(5)—Ru(4)       | 2.8689(3)  |
| Cu(1)—Ru(1)       | 2.5953(4) | Cu(1)—Ru(2)       | 2.6502(4)  |
| Cu(1)—Ru(5)       | 2.6583(4) | Cu(2)—Ru(2)       | 2.6304(4)  |
| Cu(2)—Ru(3)       | 2.6250(4) | Cu(2)—Ru(5)       | 2.6560(4)  |
| Cu(1)—Ru(1)—Ru(2) | 55.99(1)  | Cu(1)—Ru(1)—Ru(5) | 57.72(1)   |
| Cu(1)—Ru(2)—Ru(1) | 54.27(1)  | Cu(1)—Ru(2)—Ru(5) | 56.83(1)   |
| Cu(2)—Ru(2)—Ru(5) | 56.96(1)  | Cu(2)—Ru(2)—Ru(3) | 55.08(1)   |
| Cu(2)—Ru(3)—Ru(2) | 55.25(1)  | Cu(2)—Ru(3)—Ru(5) | 57.23(1)   |
| Ru(1)—Cu(1)—N(1)  | 143.89(9) | Ru(2)—Cu(1)—N(1)  | 131.20(8)  |
| Ru(5)—Cu(1)—N(1)  | 143.87(9) | Ru(2)—Cu(2)—N(2)  | 136.89(8)  |
| Ru(5)—Cu(2)—N(2)  | 146.85(9) | Ru(3)—Cu(2)—N(2)  | 135.87(9)  |
| Ru(1)—Cu(1)—Ru(2) | 69.75(1)  | Cu(2)—Ru(3)—Te(1) | 110.900(1) |
| Ru(1)—Cu(1)—Ru(5) | 66.65(1)  | Cu(2)—Ru(3)—Ru(4) | 117.54(1)  |
| Ru(2)—Cu(1)—Ru(5) | 66.61(1)  | Cu(2)—Ru(5)—Cu(1) | 94.09(1)   |
| Ru(5)—Cu(2)—Ru(3) | 66.58(1)  | Cu(2)—Ru(5)—Ru(4) | 114.33(1)  |
| Ru(5)—Cu(2)—Ru(2) | 66.92(1)  | Cu(1)—Ru(5)—Ru(4) | 113.99(1)  |
| Ru(3)—Cu(2)—Ru(2) | 69.68(1)  | Cu(2)—Ru(5)—Ru(1) | 117.86(1)  |
| Cu(1)—Ru(1)—Te(1) | 111.78(1) | Cu(1)—Ru(5)—Ru(1) | 55.63(1)   |
| Cu(1)—Ru(1)—Ru(4) | 118.15(1) | Cu(2)—Ru(5)—Ru(3) | 56.20(1)   |
| Cu(1)—Ru(2)—Cu(2) | 94.88(1)  | Cu(1)—Ru(5)—Ru(3) | 118.11(1)  |



|                                                |           |                   |           |
|------------------------------------------------|-----------|-------------------|-----------|
| Cu(1)—Ru(2)—Te(1)                              | 110.06(1) | Cu(2)—Ru(5)—Ru(2) | 56.12(1)  |
| Cu(2)—Ru(2)—Te(1)                              | 111.02(1) | Cu(1)—Ru(5)—Ru(2) | 56.56(1)  |
| Cu(1)—Ru(2)—Ru(3)                              | 114.87(1) | Cu(1)—N(1)—C(15)  | 177.3(3)  |
| Cu(2)—Ru(2)—Ru(1)                              | 114.88(1) | Cu(2)—N(2)—C(17)  | 168.6(3)  |
| <b>3b</b> · 0.5CH <sub>2</sub> Cl <sub>2</sub> |           |                   |           |
| Te(1)—Ru(1)                                    | 2.6714(6) | Te(1)—Ru(2)       | 2.6742(6) |
| Te(1)—Ru(3)                                    | 2.7080(7) | Te(1)—Ru(4)       | 2.7123(7) |
| Ru(1)—Ru(2)                                    | 3.0150(8) | Ru(1)—Ru(4)       | 2.8235(7) |
| Ru(3)—Ru(2)                                    | 2.8177(7) | Ru(3)—Ru(4)       | 2.8465(8) |
| Ru(5)—Ru(1)                                    | 2.9009(7) | Ru(5)—Ru(2)       | 2.8970(7) |
| Ru(5)—Ru(3)                                    | 2.8192(7) | Ru(5)—Ru(4)       | 2.8247(7) |
| Cu(1)—Ru(1)                                    | 2.588(1)  | Cu(1)—Ru(2)       | 2.655(1)  |
| Cu(2)—Ru(1)                                    | 2.6321(9) | Cu(2)—Ru(2)       | 2.6445(9) |
| Cu(2)—Ru(5)                                    | 2.660(1)  | Cu(1)—Cu(2)       | 2.645(1)  |
| Cu(1)—Ru(1)—Ru(2)                              | 55.95(2)  | Cu(1)—Ru(1)—Ru(5) | 106.83(3) |
| Cu(1)—Ru(2)—Ru(1)                              | 53.86(2)  | Cu(1)—Ru(2)—Ru(5) | 105.15(3) |
| Cu(2)—Ru(1)—Ru(2)                              | 55.35(2)  | Cu(2)—Ru(1)—Ru(5) | 57.23(2)  |
| Cu(2)—Ru(2)—Ru(1)                              | 54.96(2)  | Cu(2)—Ru(2)—Ru(5) | 57.16(2)  |
| Cu(1)—Ru(1)—Cu(2)                              | 60.87(3)  | Cu(1)—Ru(2)—Cu(2) | 59.87(3)  |
| Ru(1)—Cu(1)—Cu(2)                              | 60.38(3)  | Cu(2)—Ru(2)—Te(1) | 110.52(3) |
| Ru(1)—Cu(1)—Ru(2)                              | 70.19(3)  | Cu(1)—Ru(2)—Te(1) | 82.36(3)  |
| Cu(2)—Cu(1)—Ru(2)                              | 59.86(3)  | Cu(2)—Ru(2)—Ru(3) | 116.07(3) |
| Cu(2)—Ru(1)—Cu(1)                              | 60.87(3)  | Cu(1)—Ru(2)—Ru(3) | 137.93(3) |
| Ru(2)—Ru(1)—Cu(1)                              | 55.95(2)  | Cu(2)—Ru(5)—Ru(3) | 115.50(3) |
| Cu(1)—Ru(1)—Ru(5)                              | 106.83(3) | Cu(2)—Ru(5)—Ru(4) | 115.23(3) |
| Cu(1)—Ru(1)—Te(1)                              | 83.68(3)  | Cu(2)—Ru(5)—Ru(2) | 56.64(2)  |
| Cu(2)—Ru(1)—Te(1)                              | 110.99(3) | Cu(2)—Ru(5)—Ru(1) | 56.30(2)  |
| Cu(1)—Ru(1)—Ru(4)                              | 139.81(3) |                   |           |
| Cu(2)—Ru(1)—Ru(4)                              | 116.20(3) |                   |           |

**Fig. S1** Variable temperature  $^1\text{H}$  NMR spectra for **3a** from  $-40$  to  $50$   $^\circ\text{C}$  in  $\text{CDCl}_3$ .

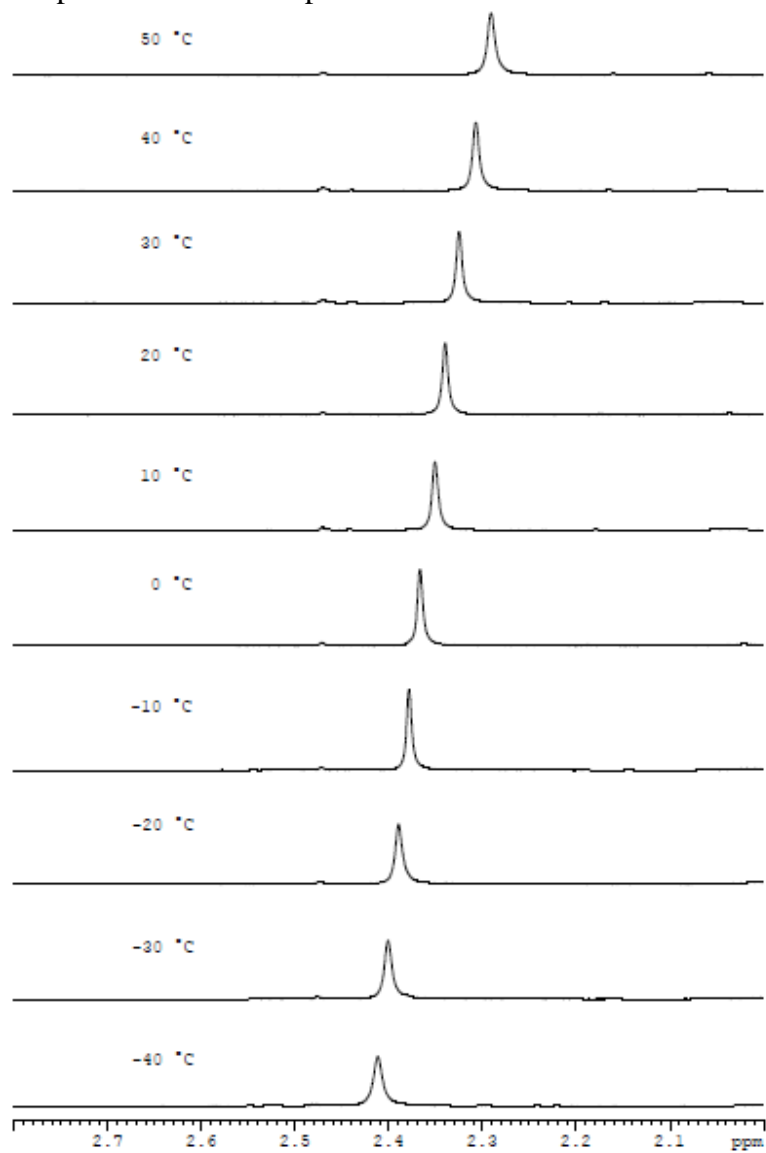

**Fig. S2** Spatial graphs (isovalue = 0.02–0.03) of the frontier molecular orbitals and their associated calculated energies of  $[\text{TeRu}_5(\text{CO})_{14}]^{2-}$ , **1**, **3a**, and **3b**

| $[\text{TeRu}_5(\text{CO})_{14}]^{2-}$                                                              | <b>1</b>                                                                                              | <b>3a</b>                                                                                            | <b>3b</b>                                                                                             |
|-----------------------------------------------------------------------------------------------------|-------------------------------------------------------------------------------------------------------|------------------------------------------------------------------------------------------------------|-------------------------------------------------------------------------------------------------------|
| 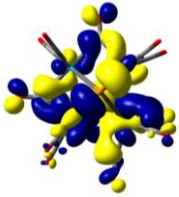<br>LUMO, 2.68 eV  | <br>LUMO, 0.58 eV    | <br>LUMO, -3.06 eV | <br>LUMO, -2.97 eV |
| <br>HOMO, -0.32 eV | <br>HOMO, -2.22 eV   | <br>HOMO, -5.93 eV | <br>HOMO, -5.97 eV |
|                                                                                                     | <br>HOMO-1, -2.37 eV |                                                                                                      |                                                                                                       |

**Fig. S3** Experimental (black) electronic absorption spectra of **1** in CH<sub>2</sub>Cl<sub>2</sub>. Vertical bars indicate the locations of calculated TD-DFT singlet-singlet excitations with oscillator strength (*f*) (blue, bar)

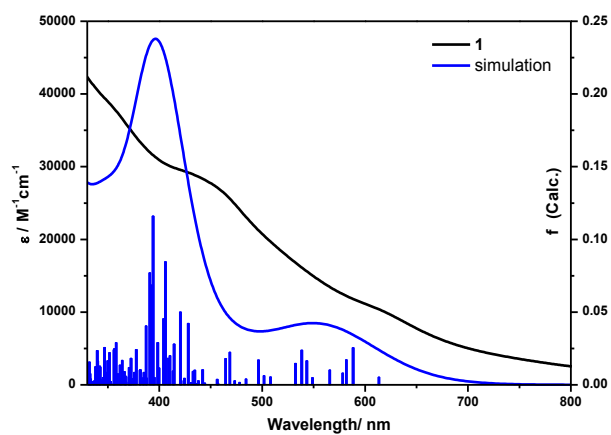

**Fig. S4** Spatial plots (isovalue = 0.025) of selected frontier orbitals for **1**, with calculations in CH<sub>2</sub>Cl<sub>2</sub>. Calculated numerical values for the MO localization (in %) on the fragments Te/Ru/Cu/Cl/CO, respectively

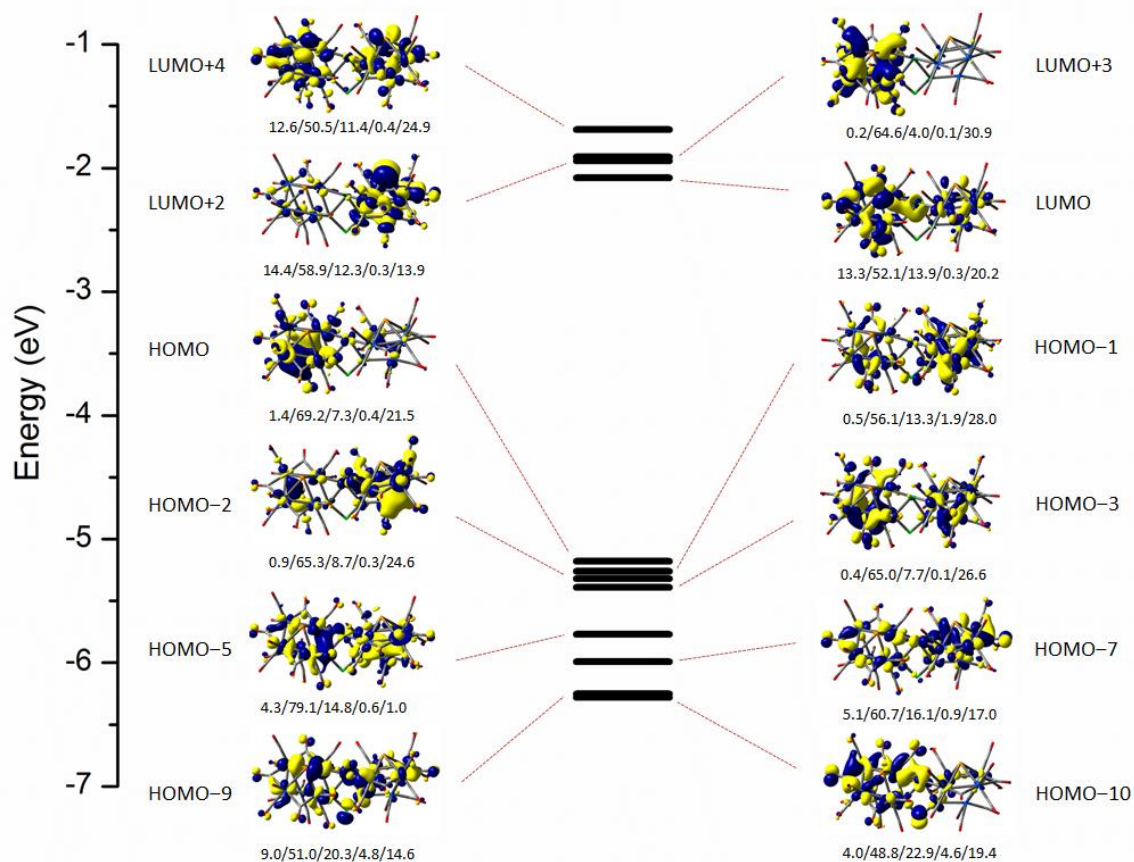

**Fig. S5** CV in MeCN for **1**, **3a**, and **3b**. Conditions: electrolyte, 0.1 M Bu<sub>4</sub>NClO<sub>4</sub>; working electrode, glassy carbon; scan rate, 100 mV S<sup>-1</sup>. Potentials are vs SCE

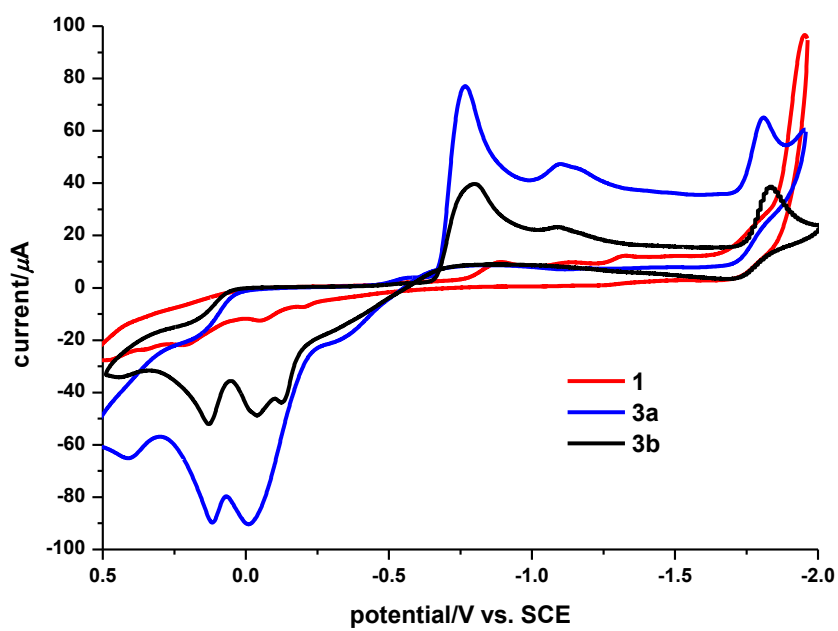

**Fig. S6** Charge vs. time plots for controlled-potential coulometry (CPC) experiments of different analytes (ferrocene (Fc), tris(2,2'-bipyridine)ruthenium(II) dichloride (Ru(bpy<sub>3</sub>)Cl<sub>2</sub>), **1**, **3a**, and **3b**)

$$\frac{\Delta Q}{nF} = kC$$

$$k = m (2\sqrt{Dt}) \text{ A}$$

$$\frac{\Delta Q}{F} = nkC = n m (2\sqrt{Dt}) \text{ A C}$$

$$\frac{Q_1 (\text{Fc} \rightarrow \text{Fc}^+)}{Q_2 (\text{analyte} \rightarrow \text{analyte}^+)} = \frac{n_1 (n_1 = 1)}{n_2}$$

Q: the total charge in coulombs (C), F: Faraday's constant (C/mol),  
 n: the number of electrons per mole of analyte, m: proportional constant,  
 D: diffusion coefficient ( $\approx 10^{-5}$  cm<sup>2</sup>/sec), t: period of time for electrolysis (sec),  
 A: the electrode's area,  $\pi r^2$  (cm<sup>2</sup>), C: concentration (mol/L)

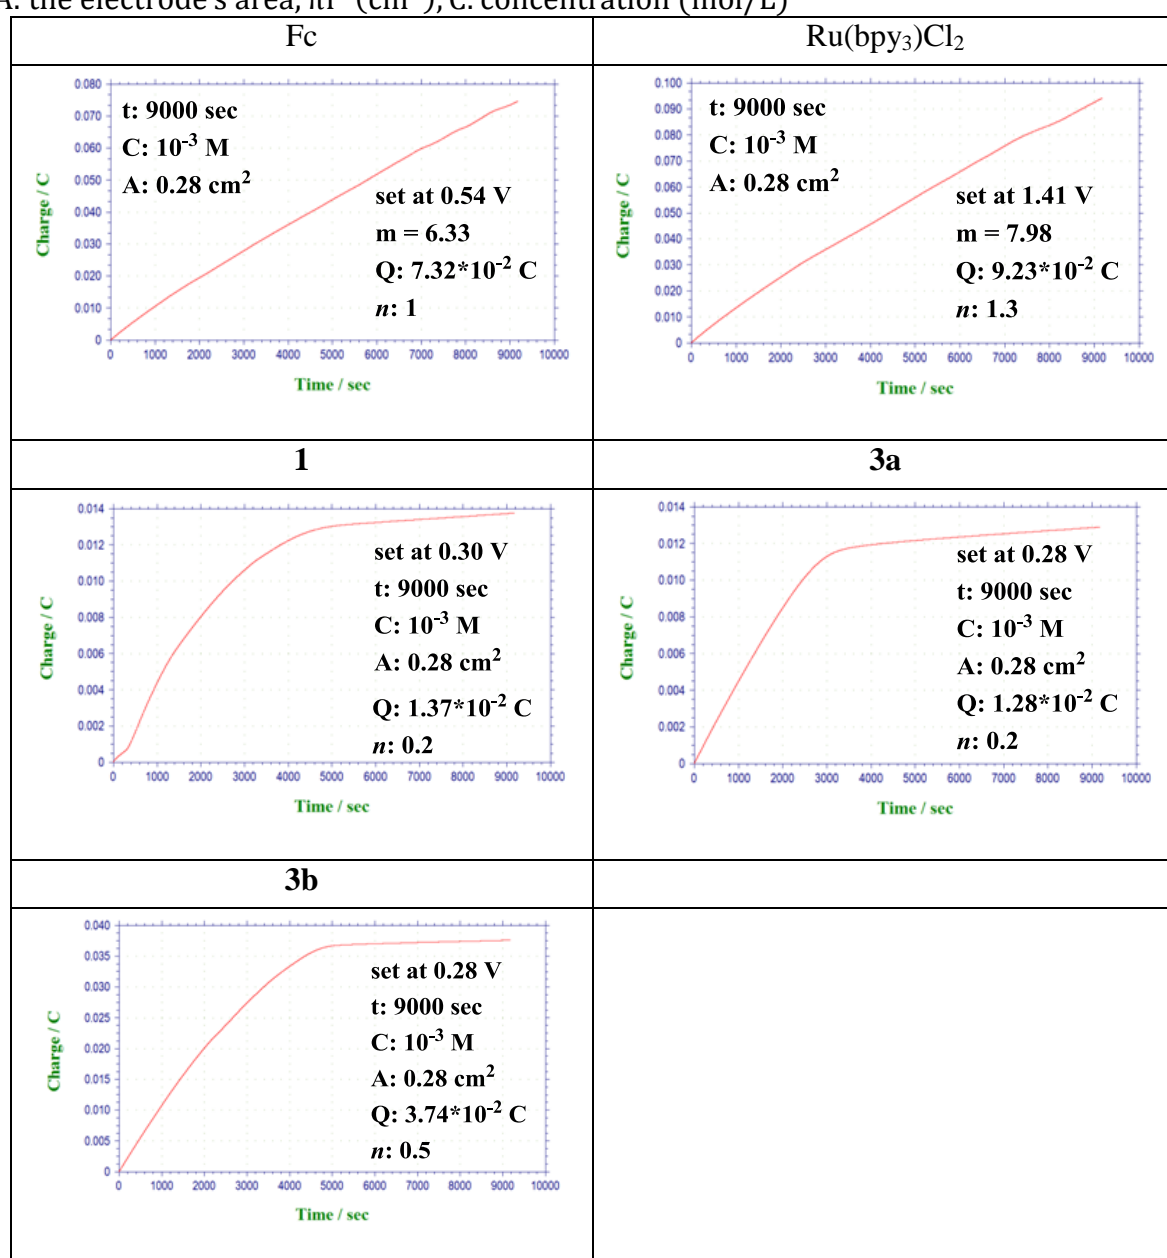

**Fig. S7** UV-vis spectra of **1** (red) and the parent cluster  $[\text{TeRu}_5(\text{CO})_{14}]^{2-}$  (black) in  $\text{CH}_2\text{Cl}_2$

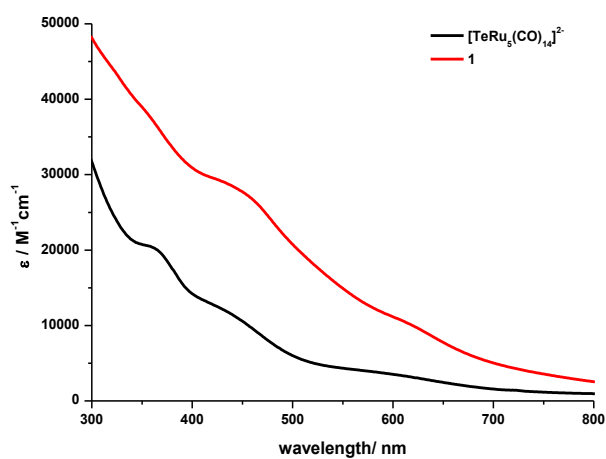

| Complex                                | $\lambda_{\text{max}}/\text{nm}$ ( $\epsilon/\text{M}^{-1} \text{cm}^{-1}$ ) |
|----------------------------------------|------------------------------------------------------------------------------|
| $[\text{TeRu}_5(\text{CO})_{14}]^{2-}$ | 353 (20662), 414 (3194), 545 (4422)                                          |
| <b>1</b>                               | 426 (29306), 595 (11428)                                                     |



**Fig. S8** The optical reflectance spectra of  $[\text{TeRu}_5(\text{CO})_{14}]^{2-}$ , **1**, **2**, **3a**, **3b**, and **4**

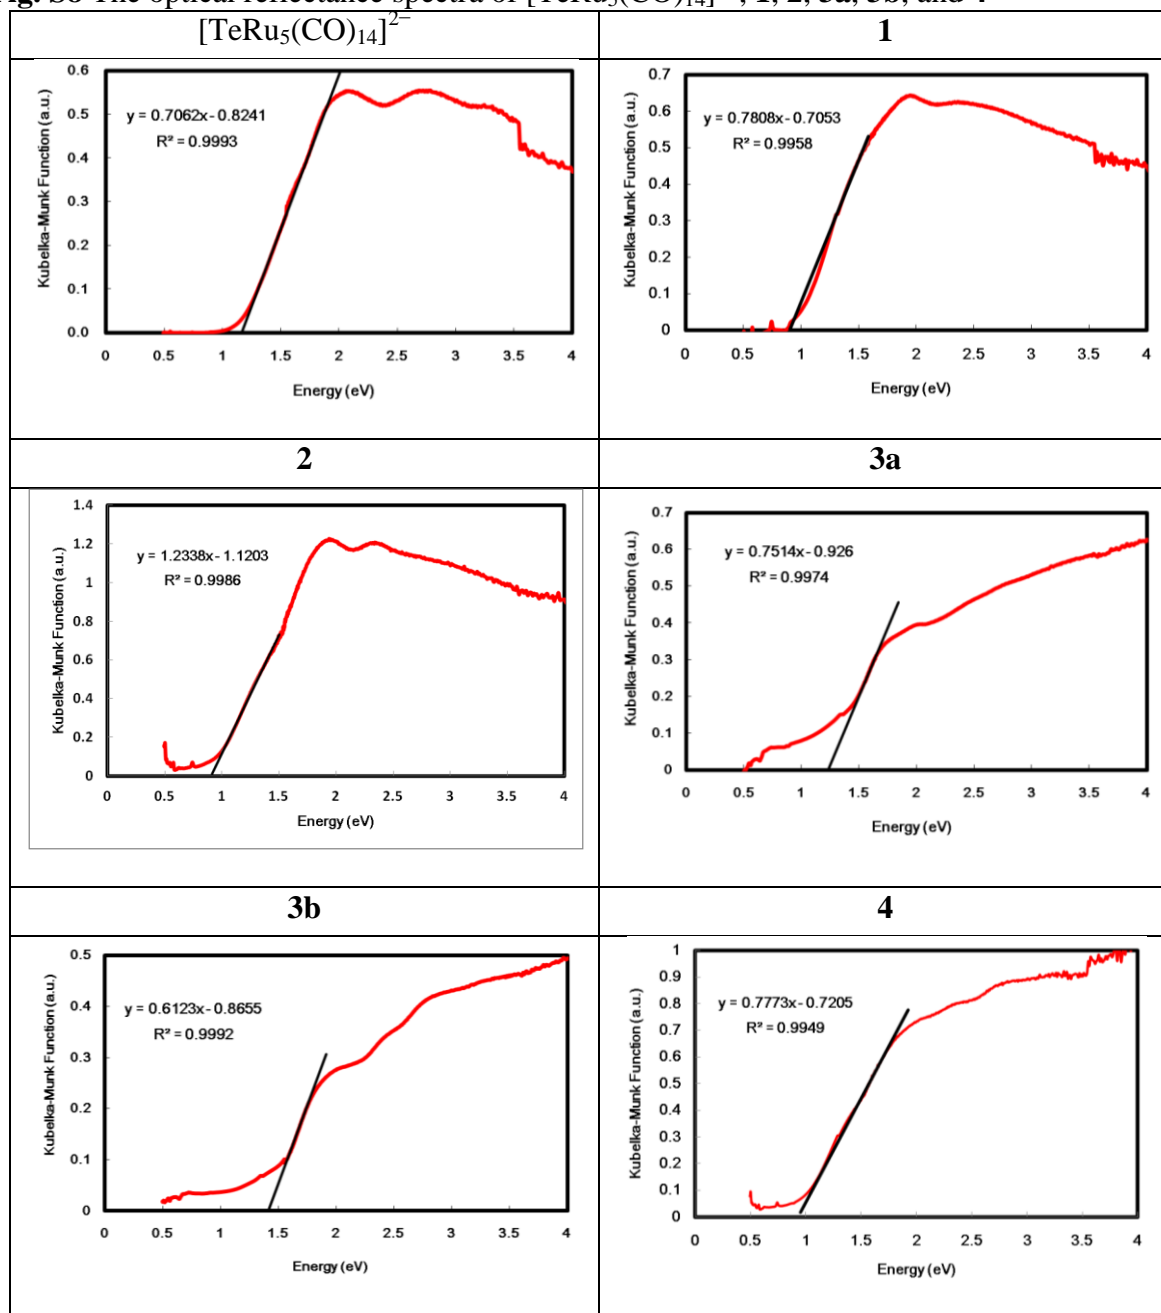

Supplement: c5dt00546a1.pdf [file c5dt00546a1.pdf]
